# Supplementary material for: Cationization of neutral small molecules by site-specific carboxylation of 10-phenyl-10H-phenothiazine in laser desorption/ionization
Source: Royal Society of Chemistry journal article supplement (doi:10.1039/d1an01111a), 2021-01-01
Supplement: d1an01111a1.pdf [file d1an01111a1.pdf]

## **Cationization of neutral small molecules by site-specific carboxylation of 10-phenyl-10H-phenothiazine in laser desorption/ionization**

Chongqing Ma<sup>† a</sup>, Tianrong Yu<sup>† a</sup>, Yue Liu<sup>† a</sup>, Rui Shi<sup>a</sup>, Rui Lv<sup>a</sup>, Ruochen Guo<sup>a</sup>, Qinghua Cao<sup>a</sup>,  
Gaole Dai<sup>a</sup>, Yu Zhao<sup>\*a</sup>, Jian Liu<sup>\*a</sup>

Institute of Functional Nano and Soft Materials (FUNSOM), Jiangsu Key Laboratory for Carbon-Based Functional Materials and Devices, Soochow University, Suzhou, Jiangsu Province 215123, China. Email: jliu@suda.edu.cn, yuzhao@suda.edu.cn

<sup>†</sup> These authors contributed to the manuscript equally.

## Index

|                              |                                                                                 |    |
|------------------------------|---------------------------------------------------------------------------------|----|
| <b>Figure S1</b>             | The chemical structures of six candidate matrixes                               | 3  |
| <b>Scheme S1</b>             | Calculation of $\Delta H$ and $\Delta G$                                        | 4  |
| <b>Figure S2</b>             | FT-IR spectra                                                                   | 5  |
| <b>Figure S3-S4</b>          | UV-vis absorption spectra                                                       | 6  |
| <b>Table S1</b>              | Summary of the analytes tested in this study                                    | 7  |
| <b>Figure S5-S12</b>         | MALDI-TOF MS Analysis of standard compounds                                     | 8  |
| <b>Figure S13</b>            | Comparison of background noise levels of matrices                               | 16 |
| <b>Figure S14-S16</b>        | The optimization of laser energy                                                | 17 |
| <b>Figure S17-S18</b>        | The optimization of molecule ratio                                              | 20 |
| <b>Figure S19-S20</b>        | MALDI mass spectra of standard compounds                                        | 22 |
| <b>Table S2</b>              | Comparison of S/N ratios for selected oligosaccharides                          | 24 |
| <b>Table S3</b>              | Comparison of S/N ratios for selected amino acids                               | 24 |
| <b>Figure S21</b>            | The detection reproducibility of PTZ(A) <sub>2</sub> -Ph(A) matrix              | 25 |
| <b>Figure S22</b>            | The quantitative analysis of linearity and LOD                                  | 26 |
| <b>Figure S23-S24</b>        | The detection of complex sample                                                 | 27 |
| <b>Figure S25</b>            | Application of PTZ(A) <sub>2</sub> -Ph(A) in urine sample detection             | 29 |
| <b>Scheme S2</b>             | Calculation of $\Delta H$ and $\Delta G$                                        | 30 |
| <b>Supporting Data Set 1</b> | PTZ-Ph and PXZ-Ph                                                               | 31 |
| <b>Supporting Data Set 2</b> | PTZ-Ph(A), PTZ(A) <sub>2</sub> -Ph(A), PXZ-Ph(A) and PXZ(A) <sub>2</sub> -Ph(A) | 35 |
| <b>Reference</b>             |                                                                                 | 51 |
| <b>Abbreviations</b>         |                                                                                 | 51 |

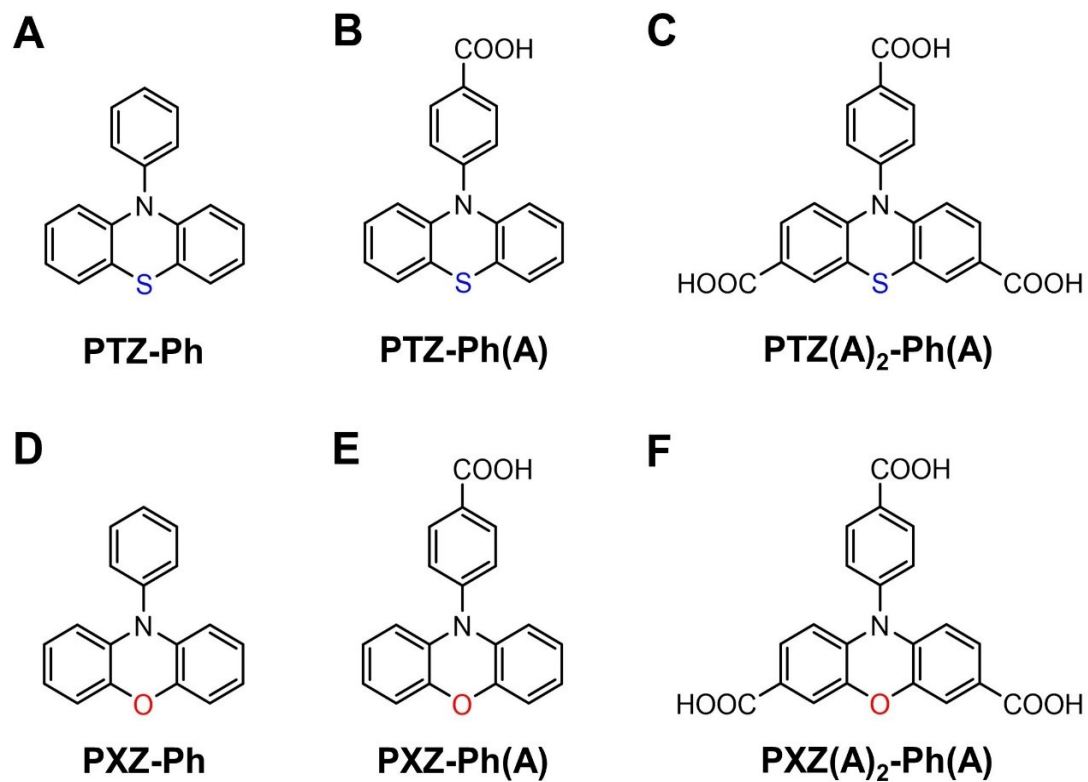

**Figure S1.** The chemical structures of PTZ-Ph, PTZ-Ph(A), PTZ(A)<sub>2</sub>-Ph(A), PXZ-Ph, PXZ-Ph(A) and PXZ(A)<sub>2</sub>-Ph(A).

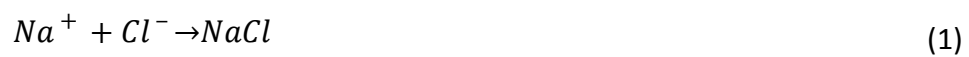

$\Delta H = -134.31$  kcal/mol;  $\Delta G = -129.22$  kcal/mol

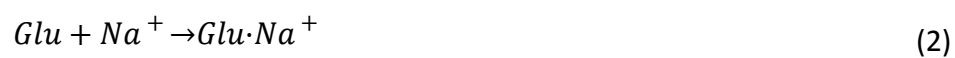

$\Delta H = -45.61$  kcal/mol;  $\Delta G = -37.36$  kcal/mol

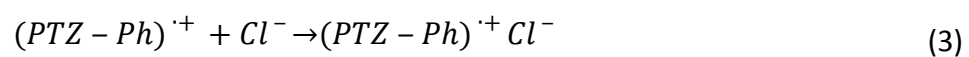

$\Delta H = -91.81$  kcal/mol;  $\Delta G = -85.02$  kcal/mol

**Scheme S1.** The calculated enthalpy changes ( $\Delta H$ ) and Gibbs free energy changes ( $\Delta G$ ) of the reactions related to the cationization of GLC.

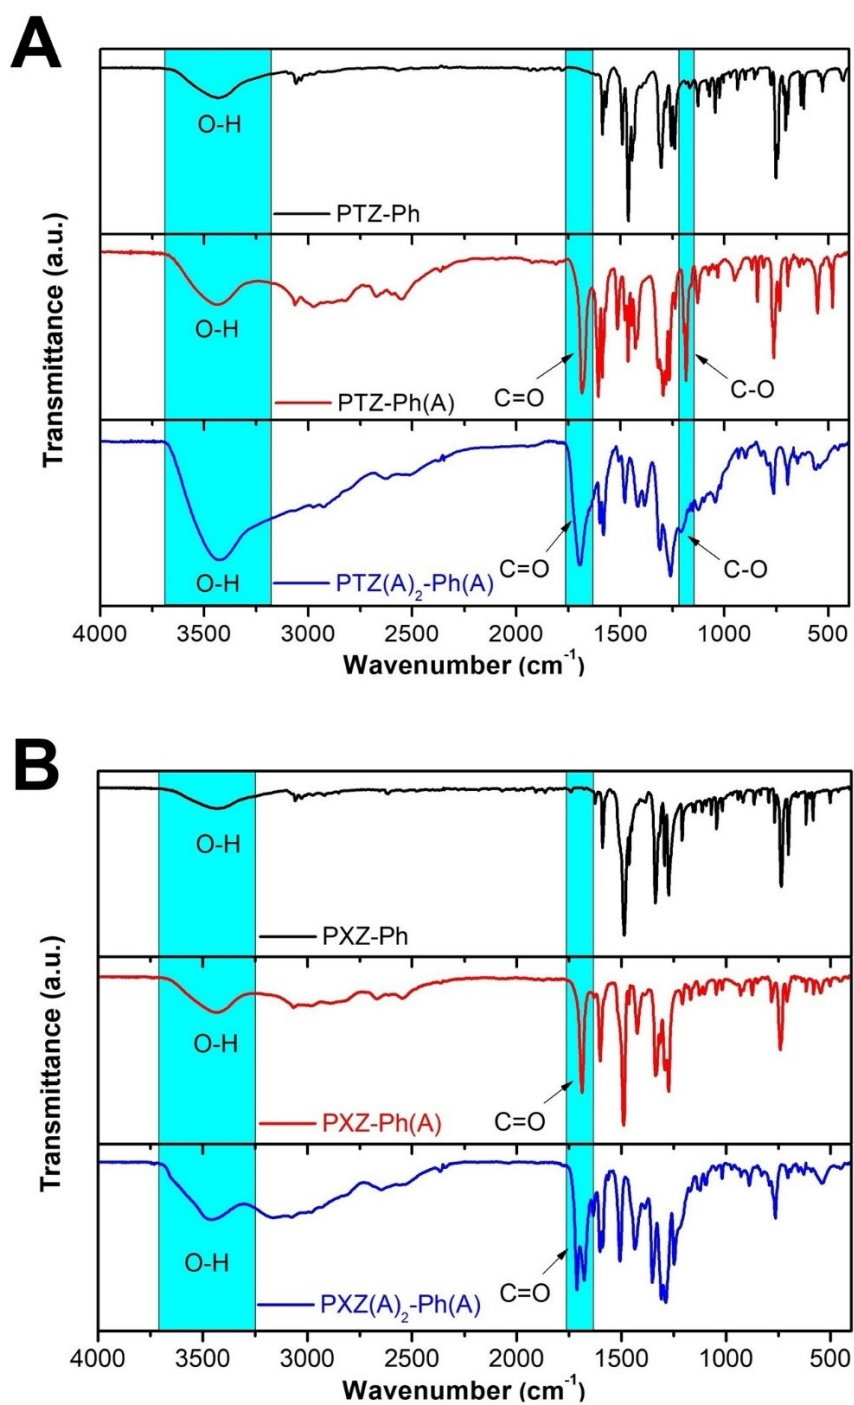

**Figure S2.** FT-IR spectra of six matrix candidates including PTZ-Ph, PTZ-Ph(A), PTZ(A)<sub>2</sub>-Ph(A), PXZ-Ph, PXZ-Ph(A), PXZ(A)<sub>2</sub>-Ph(A).

## UV-vis

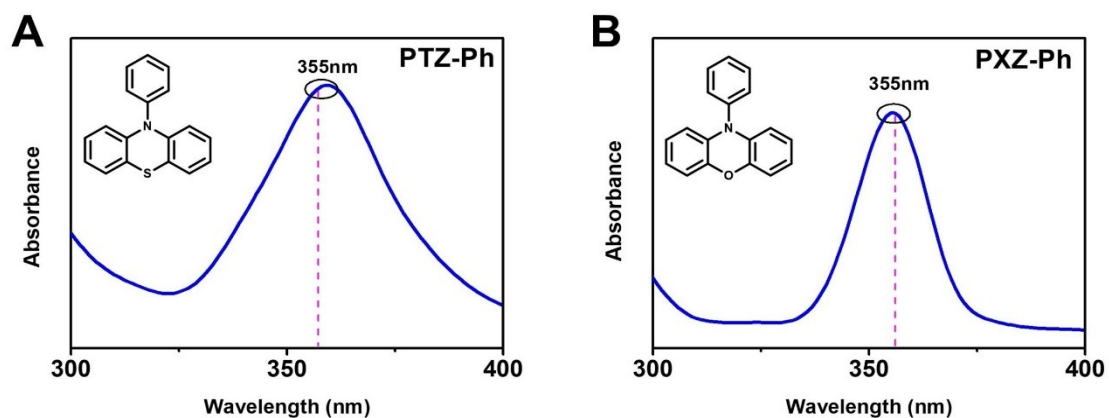

**Figure S3.** UV-vis absorption spectra of matrix candidates (A) PTZ-Ph; (B) PXZ-Ph.

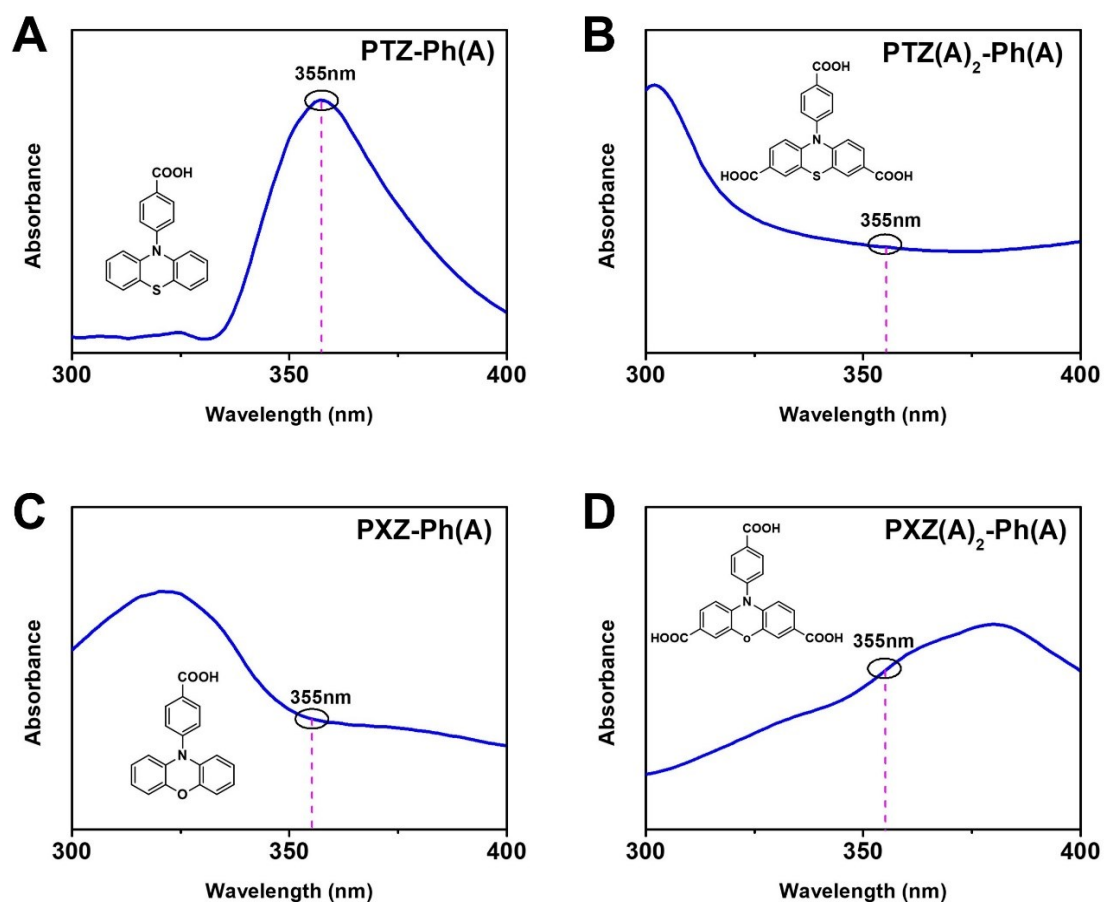

**Figure S4.** UV-vis absorption spectra of matrix candidates (A) PTZ-Ph(A), (B) PTZ(A)<sub>2</sub>-Ph(A), (C) PXZ-Ph(A), (D) PXZ(A)<sub>2</sub>-Ph(A).

**Table S1.** Summary of the analytes tested in this study.

| Name            | Abbrev. | Molecular formula    | Molecular weight [g/mol] | Molecular structure |
|-----------------|---------|----------------------|--------------------------|---------------------|
| D-Glucose       | GLC     | $C_6H_{12}O_6$       | 180.16                   |                     |
| Sucrose         | DP2     | $C_{12}H_{22}O_{11}$ | 342.30                   |                     |
| Trisaccharide   | DP3     | $C_{18}H_{32}O_{16}$ | 504.44                   |                     |
| Tetrasaccharide | DP4     | $C_{24}H_{42}O_{21}$ | 666.58                   |                     |
| L-Glutamine     | Gln     | $C_5H_{10}N_2O_3$    | 146.15                   |                     |
| L-Glutamic      | Glu     | $C_5H_9NO_4$         | 147.13                   |                     |
| L-Phenylalanine | Phe     | $C_9H_{11}NO_2$      | 165.19                   |                     |
| L-Tyrosine      | Tyr     | $C_9H_{11}NO_3$      | 181.18                   |                     |
| L-Valine        | Val     | $C_5H_{11}NO_2$      | 117.15                   |                     |

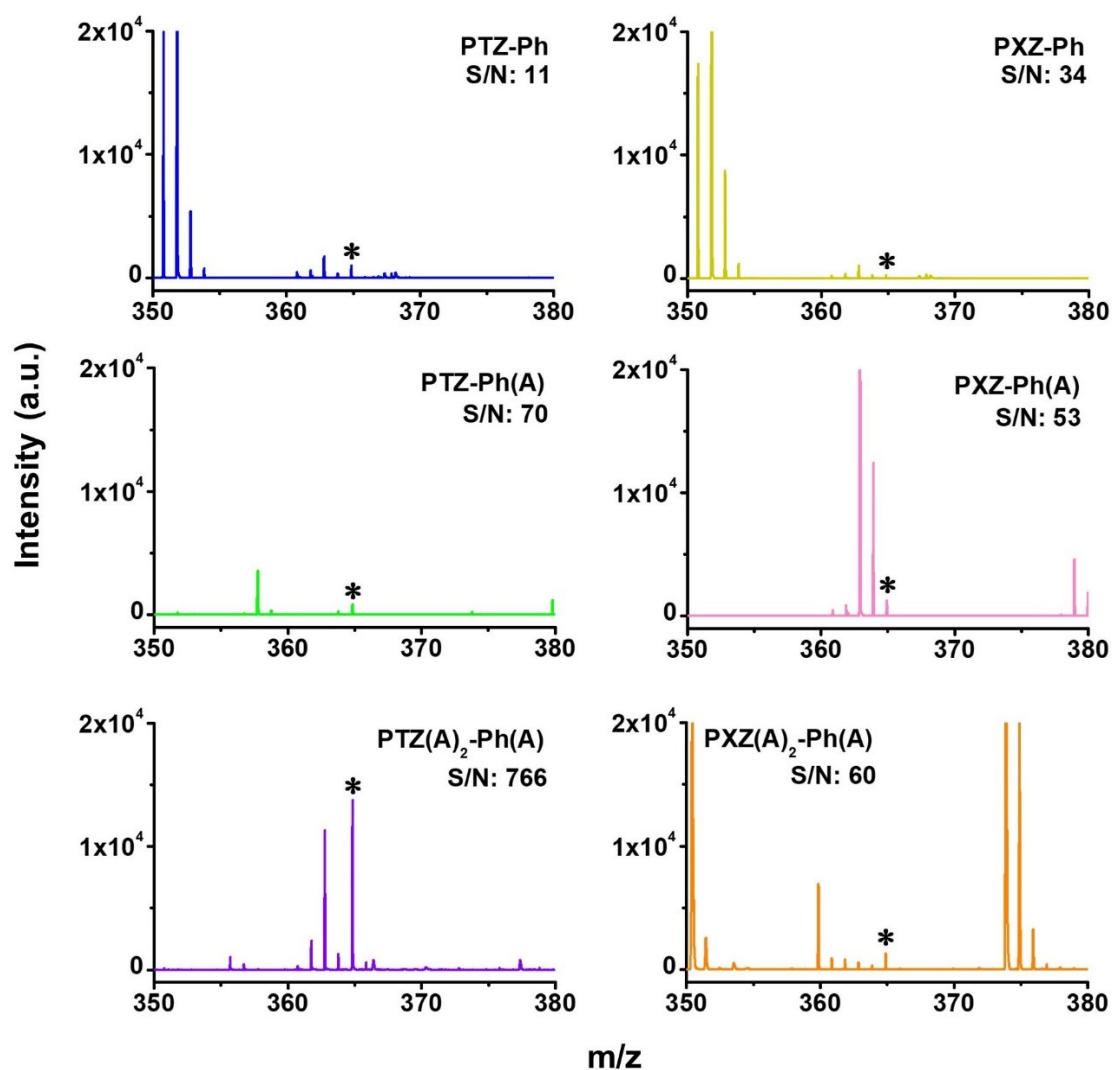

**Figure S5.** MALDI mass spectra of sucrose ( $[M+Na]^+$ ,  $m/z$  365.29) with the matrix candidates of PTZ-Ph, PTZ-Ph(A), PTZ(A)<sub>2</sub>-Ph(A), PXZ-Ph, PXZ-Ph(A), PXZ(A)<sub>2</sub>-Ph(A) in the positive-ion mode of MALDI MS. Sucrose concentration: 100  $\mu\text{g/mL}$ , laser intensity of 57  $\mu\text{J}$ , accumulated to 3000 shots.



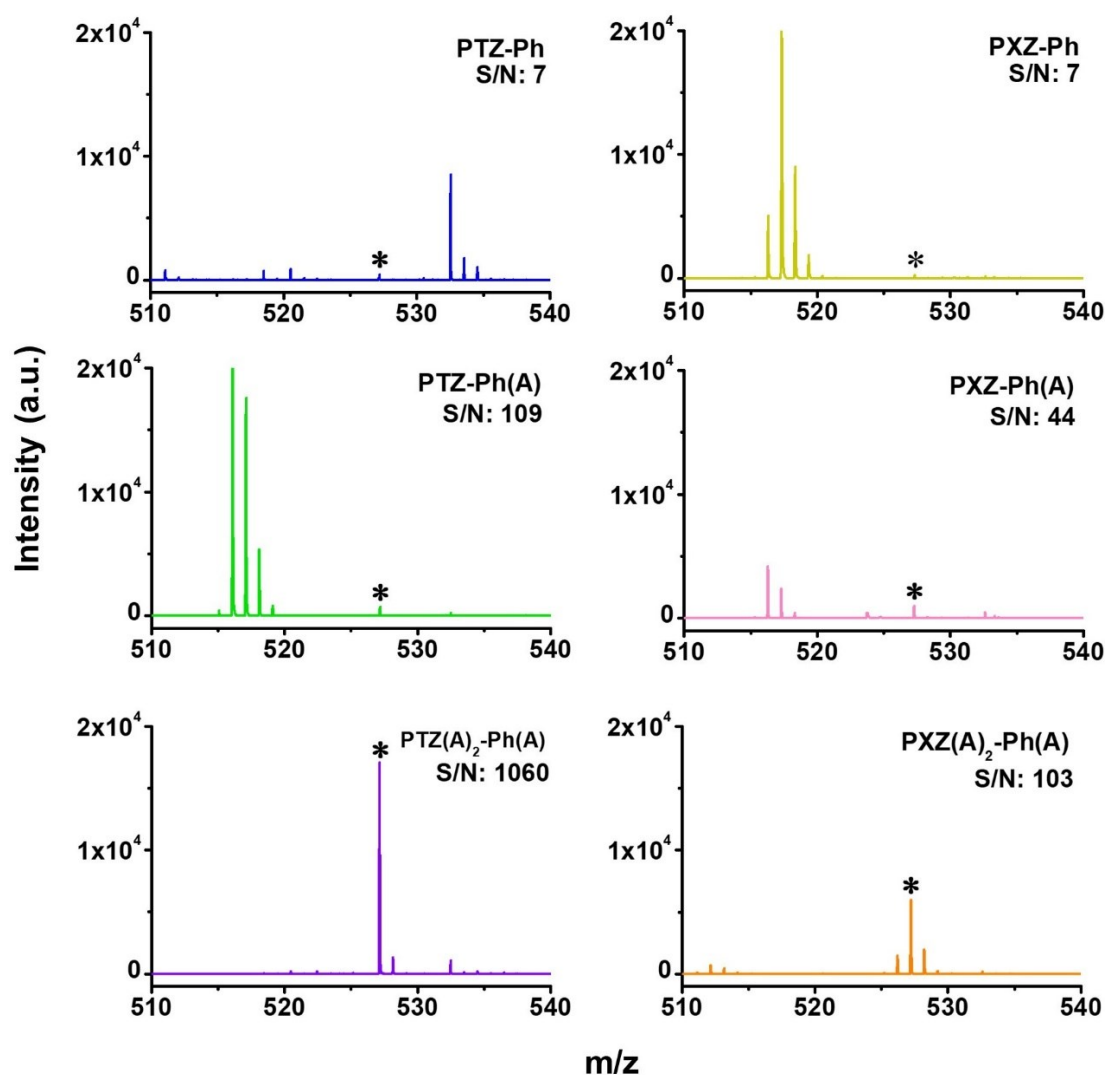

**Figure S6.** MALDI mass spectra of trisaccharide ( $[M+Na]^+$ ,  $m/z$  527.43) with the matrix candidates of PTZ-Ph, PTZ-Ph(A), PTZ(A)<sub>2</sub>-Ph(A), PXZ-Ph, PXZ-Ph(A), PXZ(A)<sub>2</sub>-Ph(A) in the positive-ion mode of MALDI MS. Trisaccharide concentration: 100  $\mu\text{g/mL}$ , laser intensity of 57  $\mu\text{J}$ , accumulated to 3000 shots.

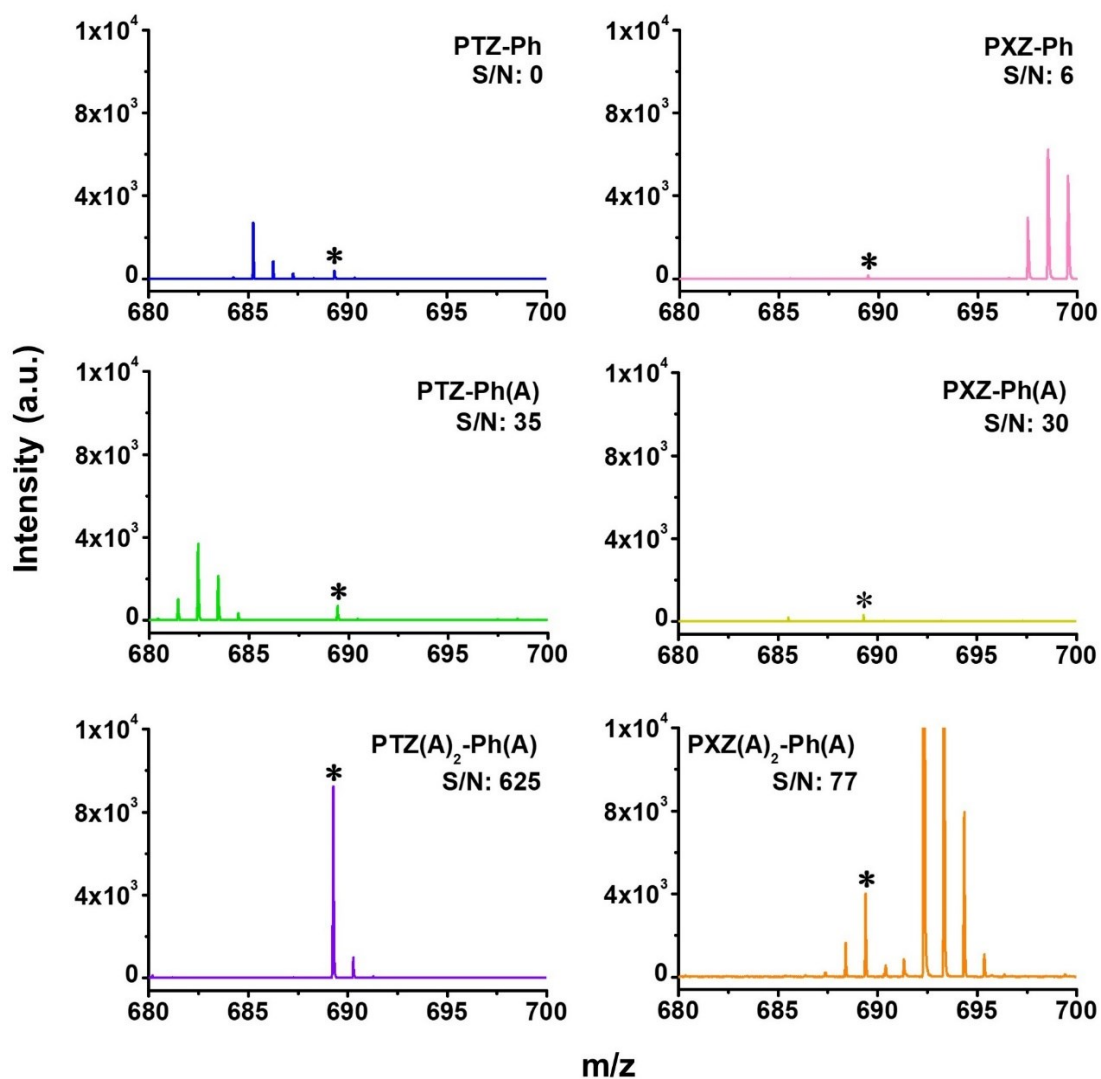

**Figure S7.** MALDI mass spectra of tetrasaccharide ( $[M+Na]^+$ ,  $m/z$  689.57) with the matrix candidates of PTZ-Ph, PTZ-Ph(A), PTZ(A)<sub>2</sub>-Ph(A), PXZ-Ph, PXZ-Ph(A), PXZ(A)<sub>2</sub>-Ph(A) in the positive-ion mode of MALDI MS. Tetrasaccharide concentration: 100  $\mu\text{g/mL}$ , laser intensity of 57  $\mu\text{J}$ , accumulated to 3000 shots.

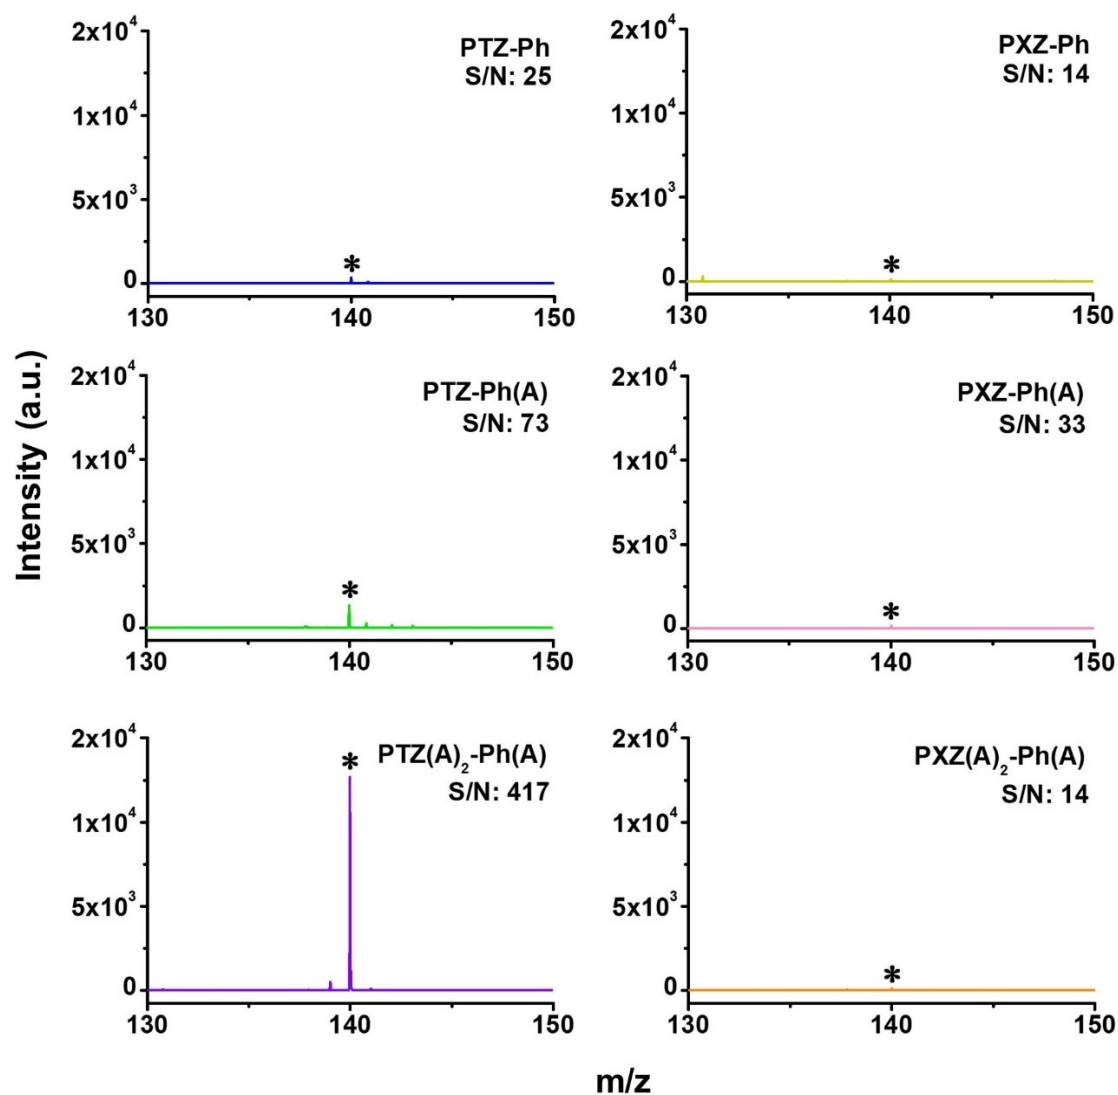

**Figure S8.** MALDI mass spectra of L-Valine ( $[M+Na]^+$ ,  $m/z$  140.14) with the matrix candidates of PTZ-Ph, PTZ-Ph(A), PTZ(A)<sub>2</sub>-Ph(A), PXZ-Ph, PXZ-Ph(A), PXZ(A)<sub>2</sub>-Ph(A) in the positive-ion mode of MALDI MS. L-Valine concentration: 100  $\mu\text{g/mL}$ , laser intensity of 57  $\mu\text{J}$ , accumulated to 3000 shots.

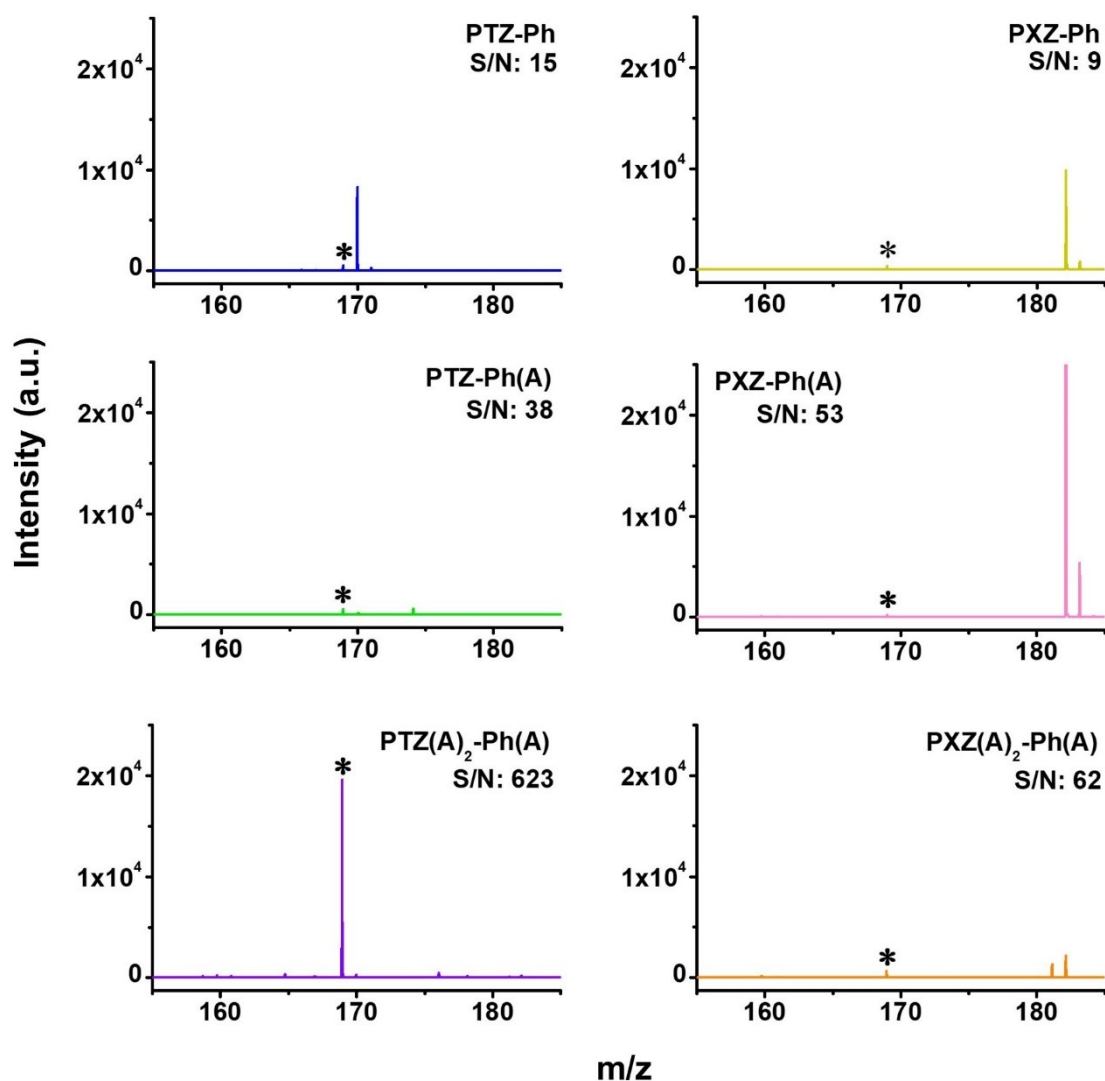

**Figure S9.** MALDI mass spectra of L-Glutamine ( $[M+Na]^+$ ,  $m/z$  169.14) with the matrix candidates of PTZ-Ph, PTZ-Ph(A), PTZ(A)<sub>2</sub>-Ph(A), PXZ-Ph, PXZ-Ph(A), PXZ(A)<sub>2</sub>-Ph(A) in the positive-ion mode of MALDI MS. L-Glutamine concentration: 100  $\mu\text{g/mL}$ , laser intensity of 57  $\mu\text{J}$ , accumulated to 3000 shots.

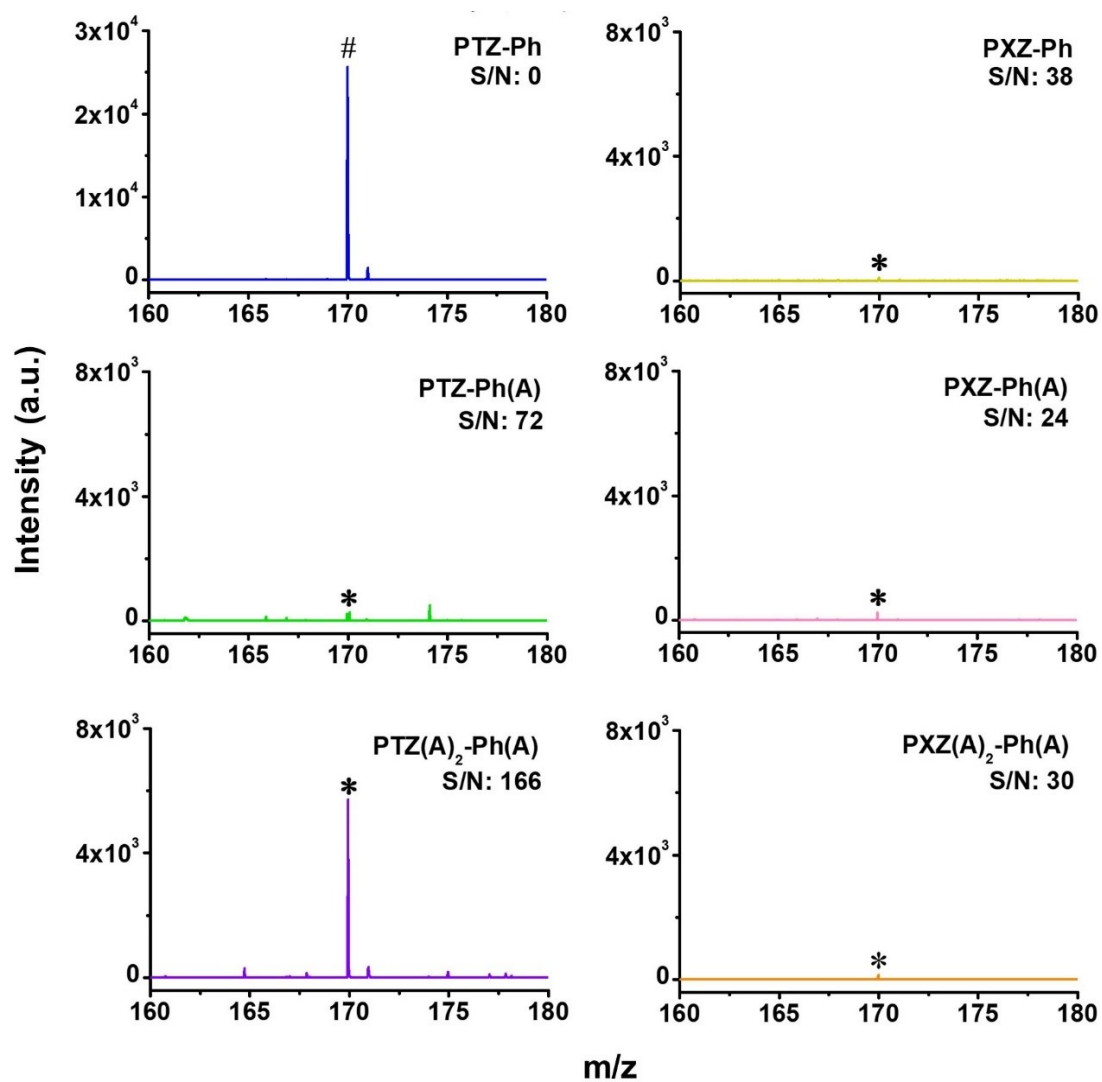

**Figure S10.** MALDI mass spectra of L-Glutamic ( $[M+Na]^+$ ,  $m/z$  170.12) with the matrix candidates of PTZ-Ph, PTZ-Ph(A), PTZ(A)<sub>2</sub>-Ph(A), PXZ-Ph, PXZ-Ph(A), PXZ(A)<sub>2</sub>-Ph(A) in the positive-ion mode of MALDI MS. L-Glutamic concentration: 100  $\mu\text{g/mL}$ , laser intensity of 57  $\mu\text{J}$ , accumulated to 3000 shots.

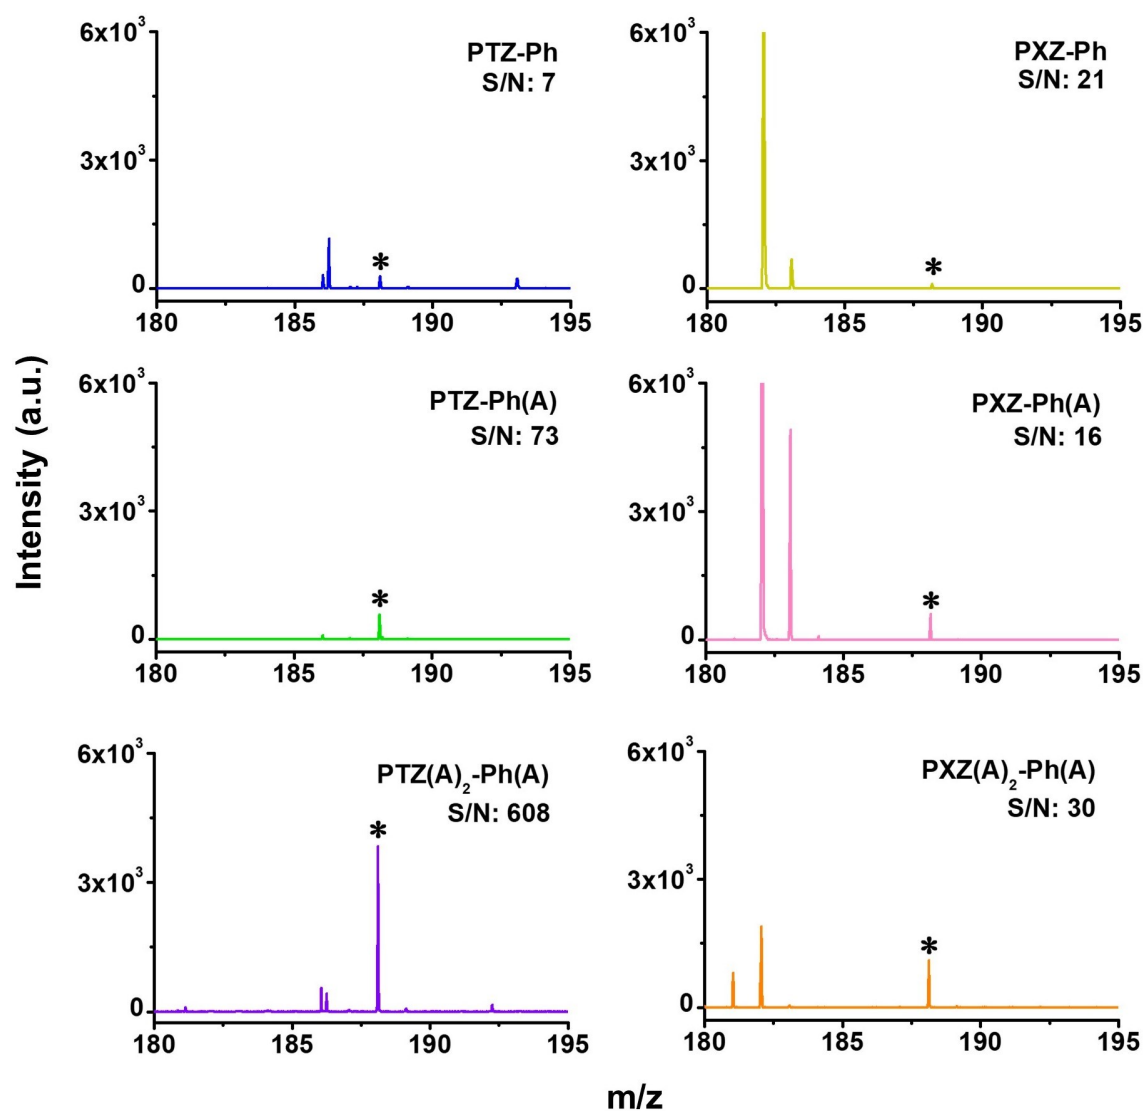

**Figure S11.** MALDI mass spectra of L-Phenylalanine ( $[M+Na]^+$ ,  $m/z$  188.18) with the matrix candidates of PTZ-Ph, PTZ-Ph(A), PTZ(A)<sub>2</sub>-Ph(A), PXZ-Ph, PXZ-Ph(A), PXZ(A)<sub>2</sub>-Ph(A) in the positive-ion mode of MALDI MS. L-Phenylalanine concentration: 100  $\mu\text{g/mL}$ , laser intensity of 57  $\mu\text{J}$ , accumulated to 3000 shots.

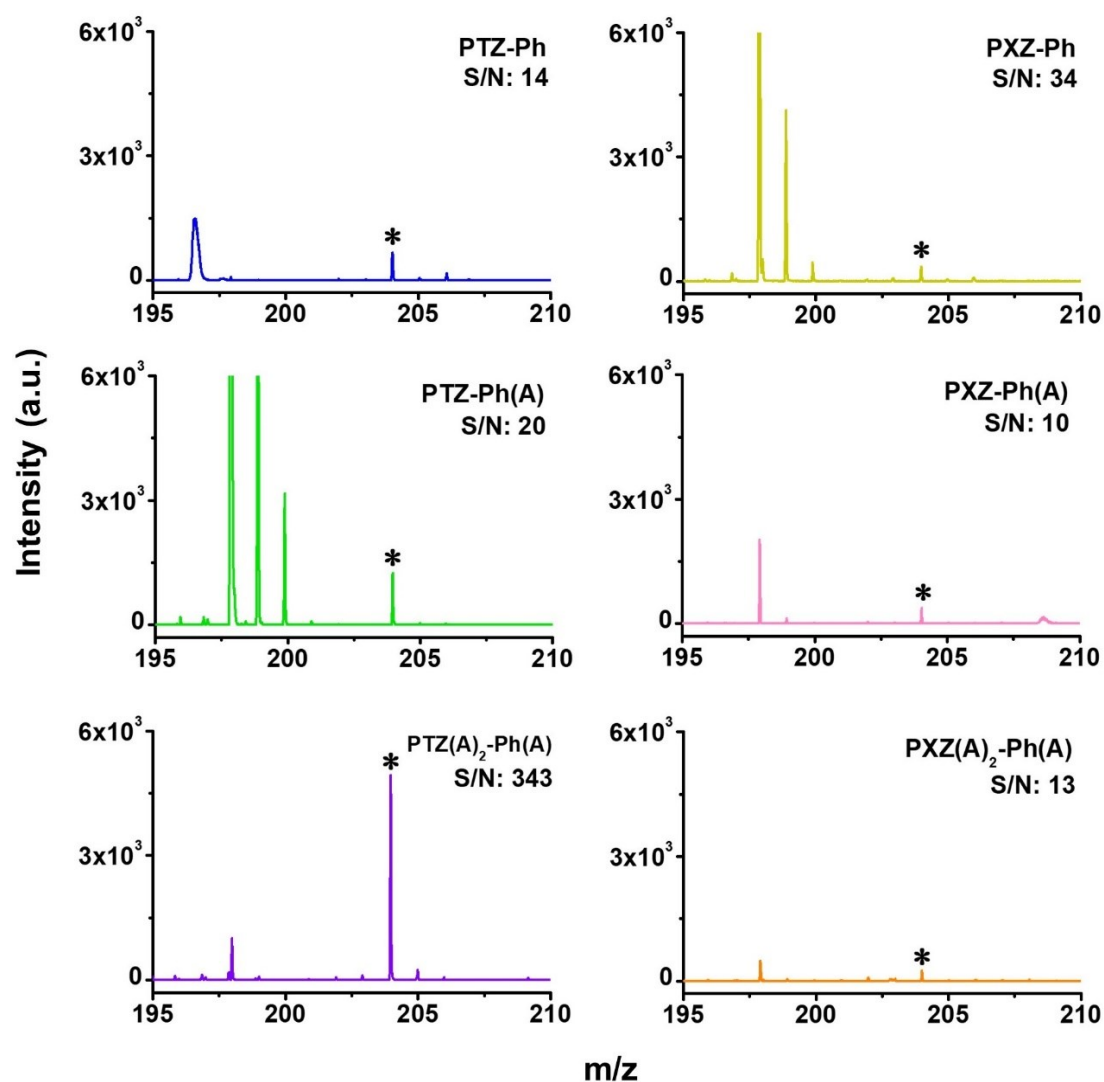

**Figure S12.** MALDI mass spectra of L-Tyrosine ( $[M+Na]^+$ ,  $m/z$  204.17) with the matrix candidates of PTZ-Ph, PTZ-Ph(A), PTZ(A)<sub>2</sub>-Ph(A), PXZ-Ph, PXZ-Ph(A), PXZ(A)<sub>2</sub>-Ph(A) in the positive-ion mode of MALDI MS. L-Tyrosine concentration: 100  $\mu\text{g/mL}$ , laser intensity of 57  $\mu\text{J}$ , accumulated to 3000 shots.

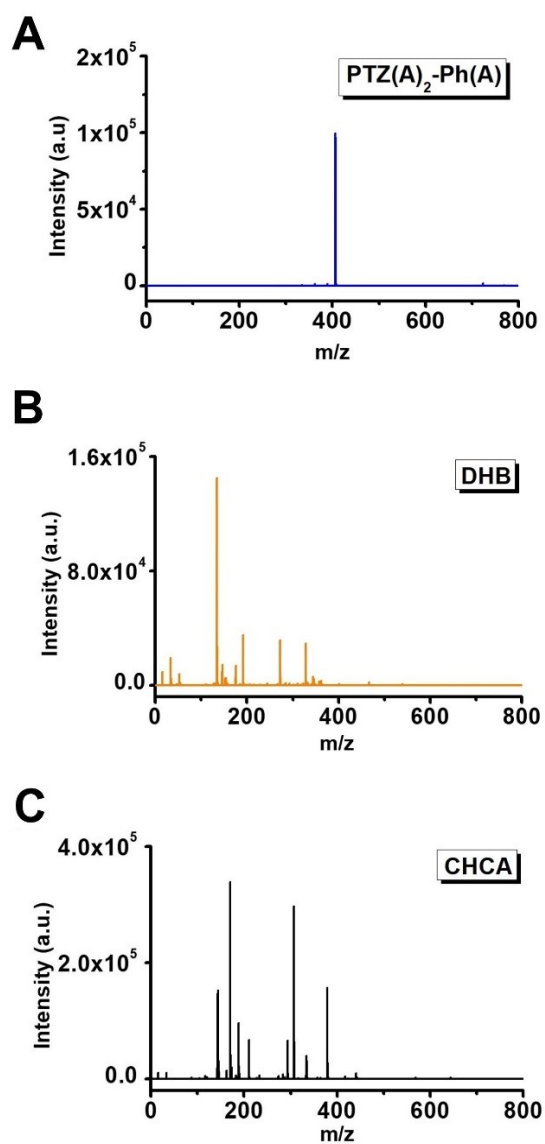

**Figure S13.** Comparison of background noise levels of matrices, including (A) PTZ(A)<sub>2</sub>-Ph(A), (B) DHB, and (C) CHCA, in the positive-ion mode of MALDI MS. Display range:  $m/z$  0-800.



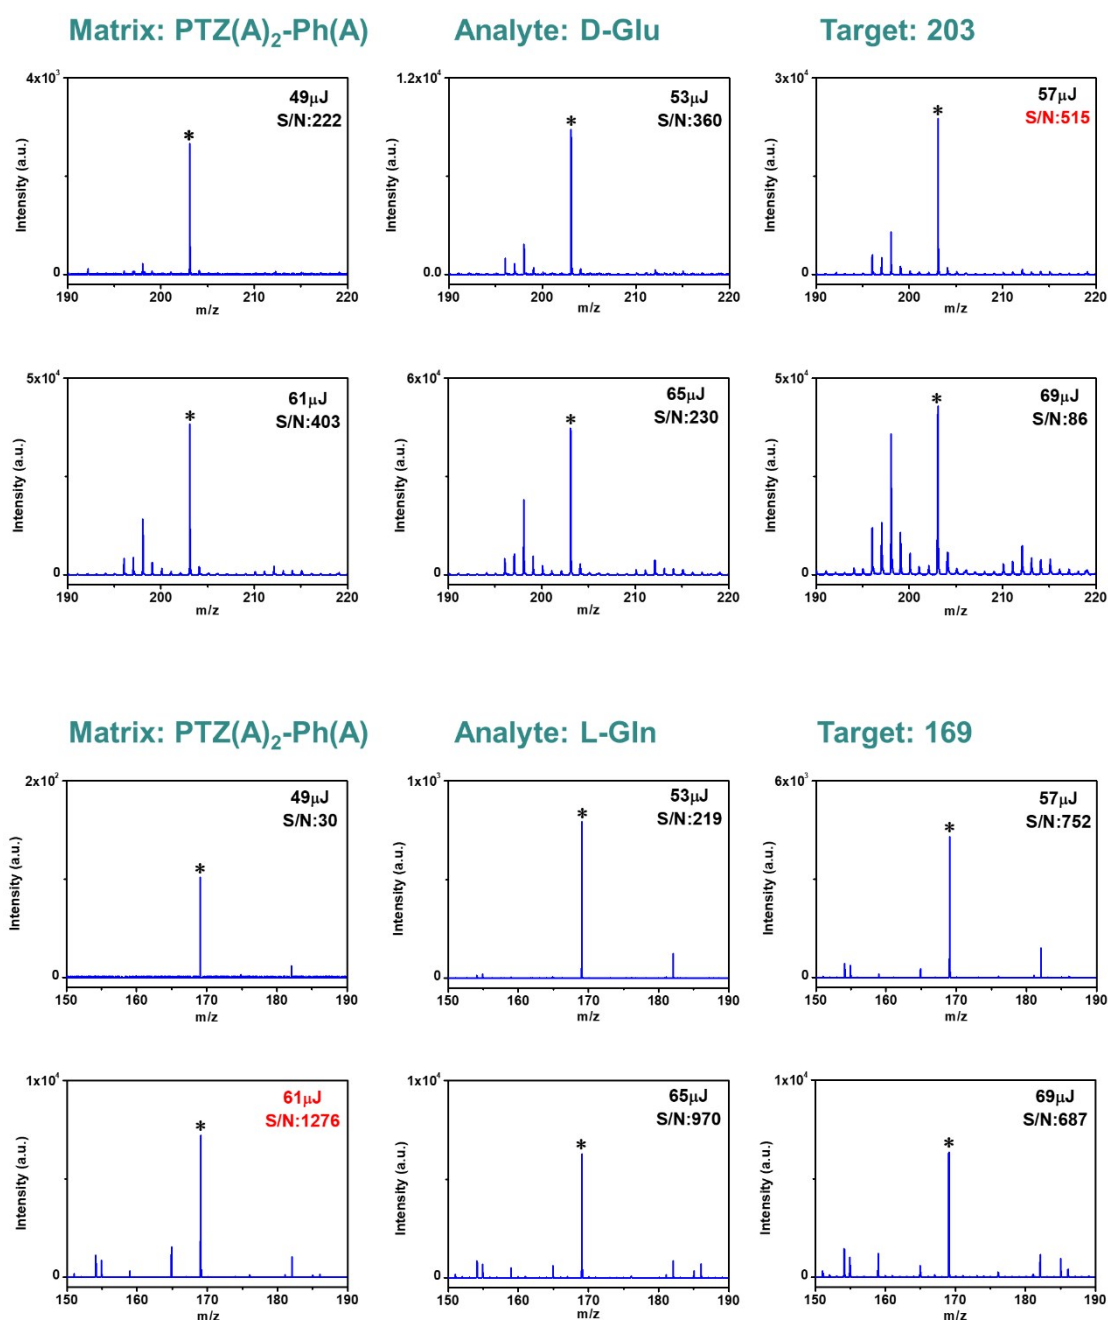

**Figure S14.** MALDI mass spectra of the D-Glucose (GLC) and L-Glutamine with PTZ(A)<sub>2</sub>-Ph(A) matrix in the positive-ion mode. The laser pulse energy levels include 49 μJ, 53 μJ, 57 μJ, 61 μJ, 65 μJ and 69 μJ, respectively. The optimal laser energy is 57 μJ for D-Glucose (GLC), or 61 μJ for L-Glutamine (L-Gln). Accumulation: 2000 shots. Laser spot size: 50~100 μm.

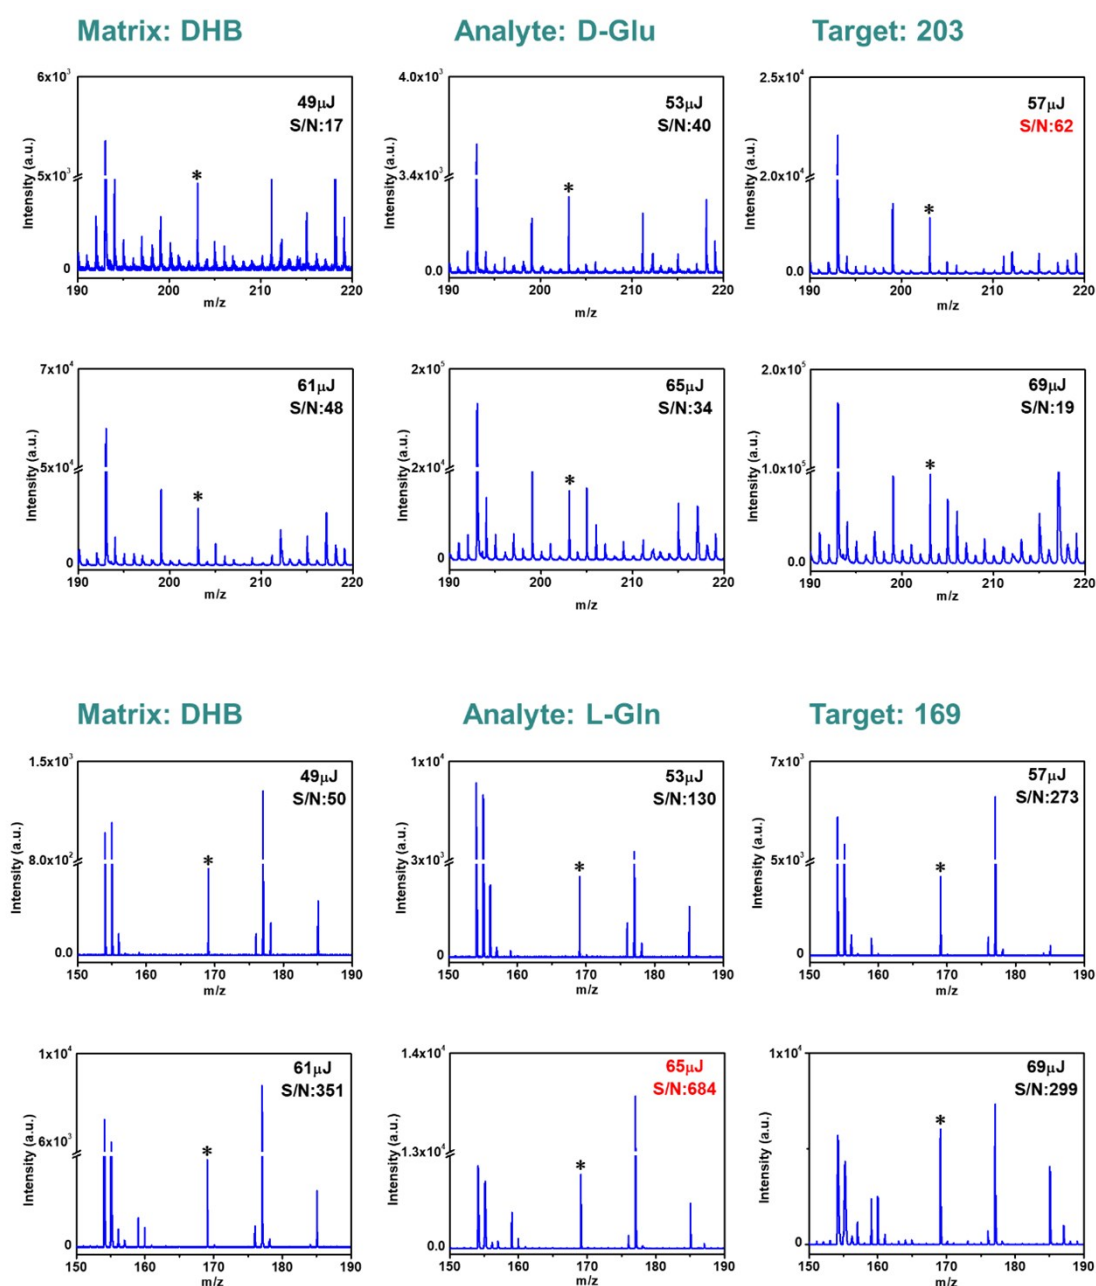

**Figure S15.** MALDI mass spectra of the D-Glucose (GLC) and L-Glutamine with DHB matrix in the positive-ion mode. The laser pulse energy levels include 49  $\mu$ J, 53  $\mu$ J, 57  $\mu$ J, 61  $\mu$ J, 65  $\mu$ J and 69  $\mu$ J, respectively. The optimal laser energy is 57  $\mu$ J for D-Glucose (GLC), or 65  $\mu$ J for L-Glutamine (L-Gln). Accumulation: 2000 shots. Laser spot size: 50~100  $\mu$ m.

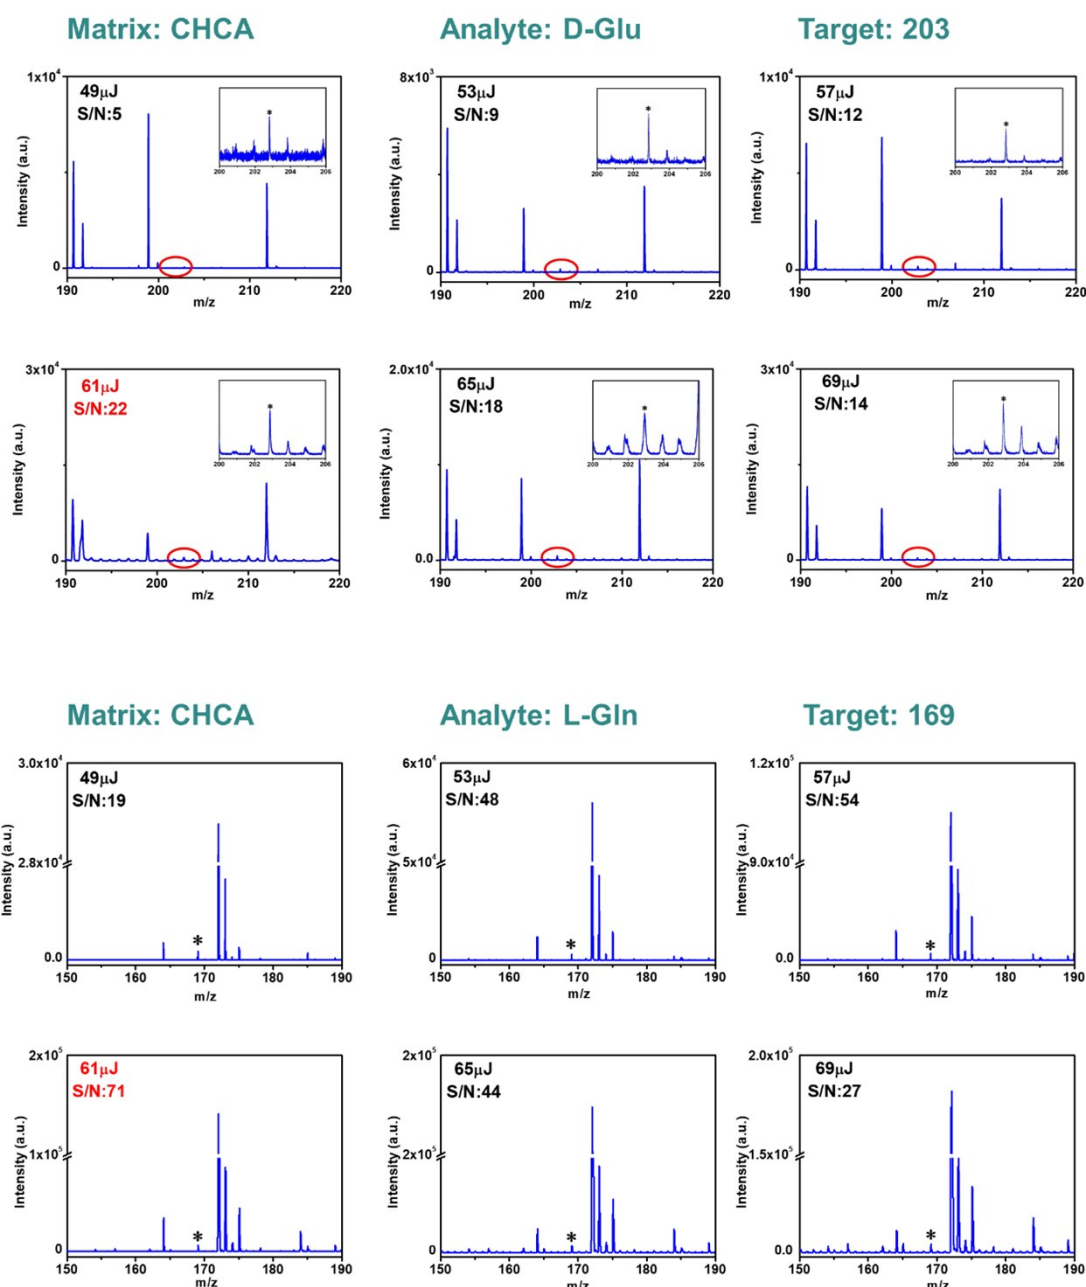

**Figure S16.** MALDI mass spectra of the D-Glucose (GLC) and L-Glutamine with CHCA matrix in the positive-ion mode. The laser pulse energy levels include 49  $\mu$ J, 53  $\mu$ J, 57  $\mu$ J, 61  $\mu$ J, 65  $\mu$ J and 69  $\mu$ J, respectively. The optimal laser energy is 61  $\mu$ J for D-Glucose (GLC) and L-Glutamine (L-Gln). Accumulation: 2000 shots. Laser spot size: 50~100  $\mu$ m.

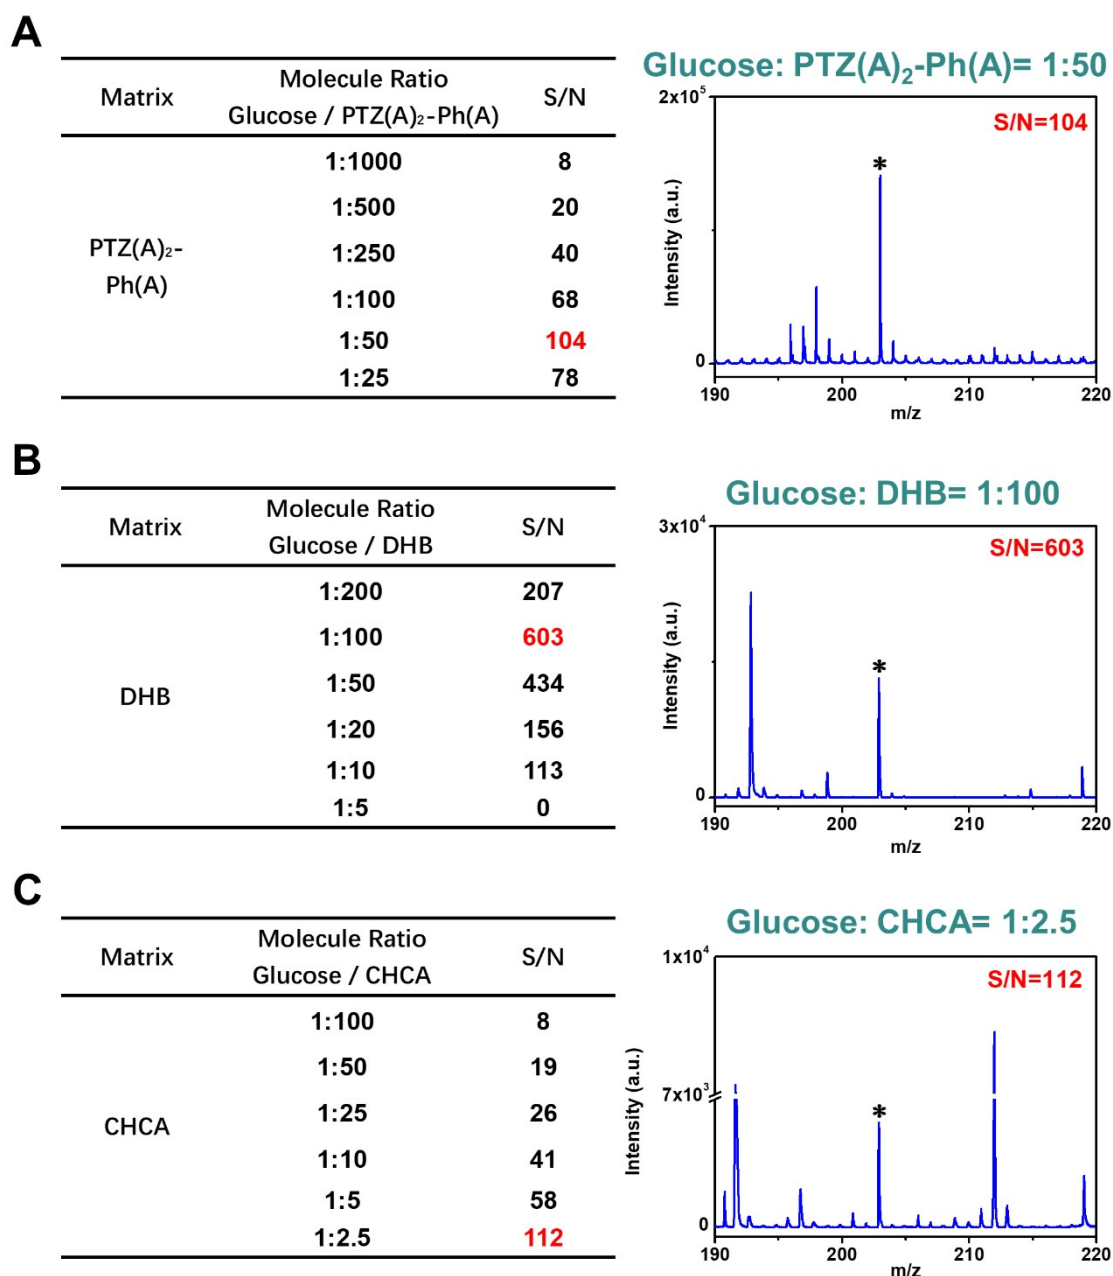

**Figure S17.** The optimal results of mixing ratio of analyte (GLC) and matrix (PTZ(A)<sub>2</sub>-Ph(A), DHB and CHCA) in the positive-ion mode. Different mixing ratios and signal to instrumental noise ratios are listed in the table (left). The MS spectrum at the optimal mixing ratio is presented by the graph (right). The optimal mixing molecule ratio for the D-Glucose (GLC) using PTZ(A)<sub>2</sub>-Ph(A), DHB and CHCA is 1:50, 1:100 and 1:2.5, respectively. Accumulation: 2000 shots. Laser spot size: 50~100 μm.

**A**

| Matrix                         | Molecule Ratio<br>L-Gln / PTZ(A) <sub>2</sub> -Ph(A) | S/N |
|--------------------------------|------------------------------------------------------|-----|
| PTZ(A) <sub>2</sub> -<br>Ph(A) | 1:1000                                               | 12  |
|                                | 1:500                                                | 23  |
|                                | 1:250                                                | 58  |
|                                | 1:100                                                | 103 |
|                                | 1:50                                                 | 195 |
|                                | 1:25                                                 | 138 |

**L-Gln: PTZ(A)<sub>2</sub>-Ph(A)= 1:50**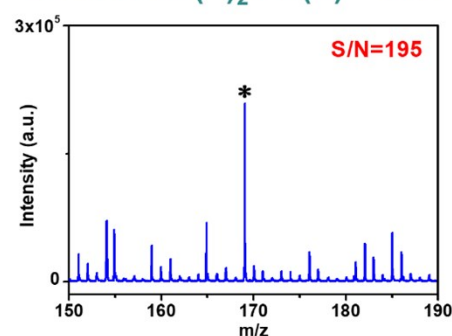**B**

| Matrix | Molecule Ratio<br>L-Gln / DHB | S/N |
|--------|-------------------------------|-----|
| DHB    | 1:400                         | 66  |
|        | 1:200                         | 81  |
|        | 1:100                         | 95  |
|        | 1:40                          | 123 |
|        | 1:20                          | 210 |
|        | 1:10                          | 155 |

**L-Gln: DHB= 1:20**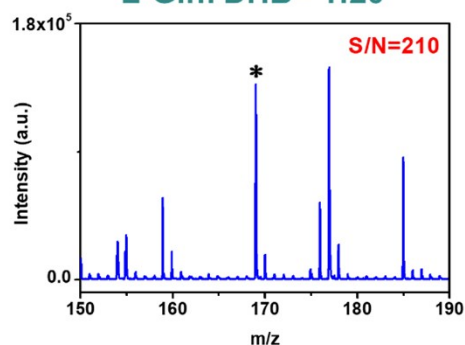**C**

| Matrix | Molecule Ratio<br>L-Gln / CHCA | S/N |
|--------|--------------------------------|-----|
| CHCA   | 1:400                          | 38  |
|        | 1:200                          | 160 |
|        | 1:100                          | 182 |
|        | 1:40                           | 91  |
|        | 1:20                           | 86  |
|        | 1:10                           | 59  |

**L-Gln: CHCA= 1:200**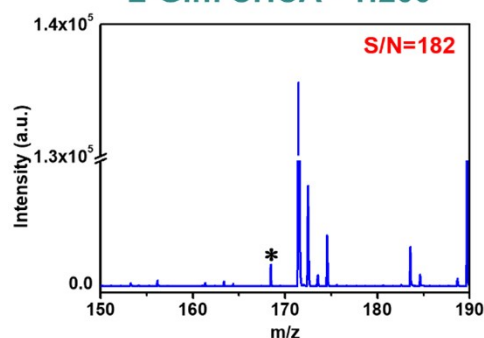

**Figure S18.** The optimal results of mixing ratio of analyte (L-Glutamine) and matrix (PTZ(A)<sub>2</sub>-Ph(A), DHB and CHCA) in the positive-ion mode. Different mixing ratios and signal to instrumental noise ratios are listed in the table (left). The MS spectrum at the optimal mixing ratio is presented by the graph (right). The optimal mixing molecule ratio for the L-Glutamine using PTZ(A)<sub>2</sub>-Ph(A), DHB and CHCA is 1:50, 1:100 and 1:2.5, respectively. Accumulation: 2000 shots. Laser spot size: 50~100  $\mu$ m.

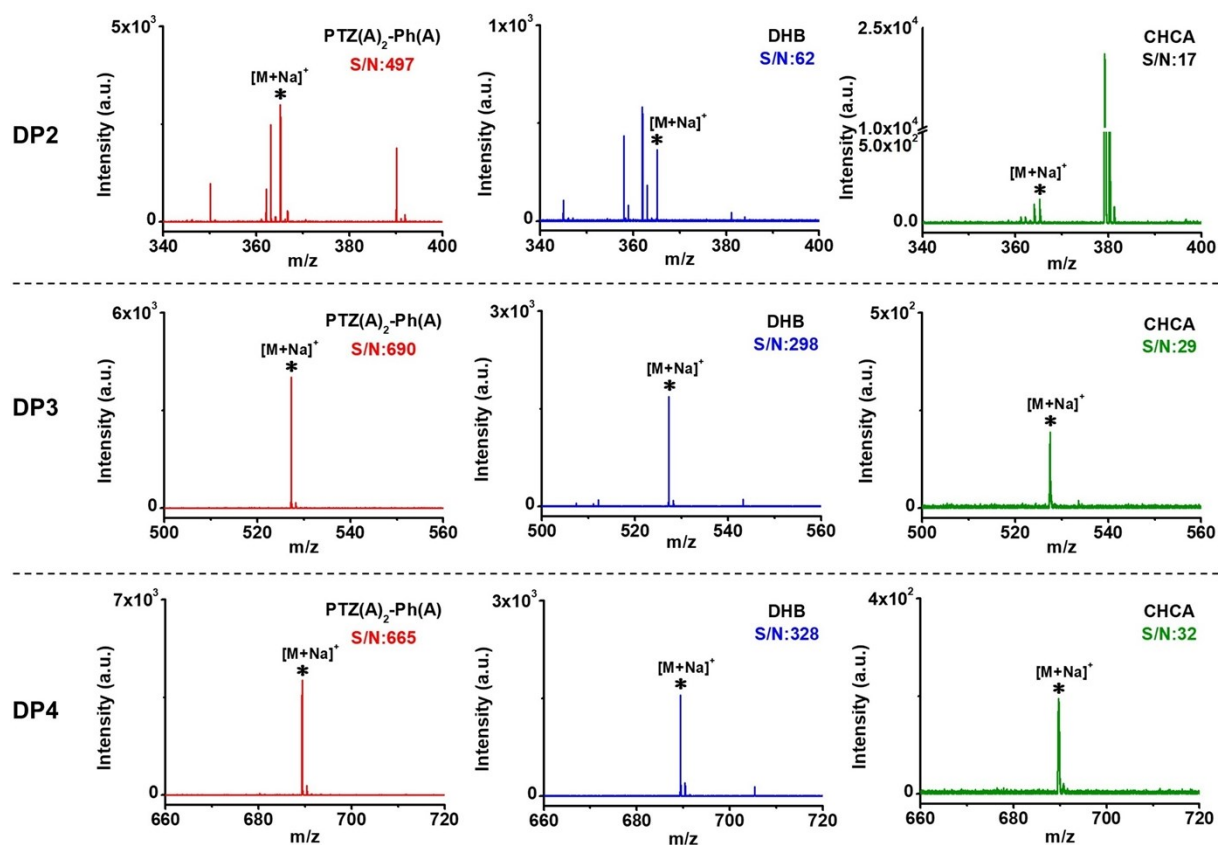

**Figure S19.** MALDI mass spectra of Sucrose (DP2), Trisaccharide (DP3) and Tetrasaccharide (DP4) obtained from the PTZ(A)<sub>2</sub>-Ph(A) matrix and the traditional matrixes of DHB and CHCA. All analytes are tested in the concentration of 100 µg/mL.

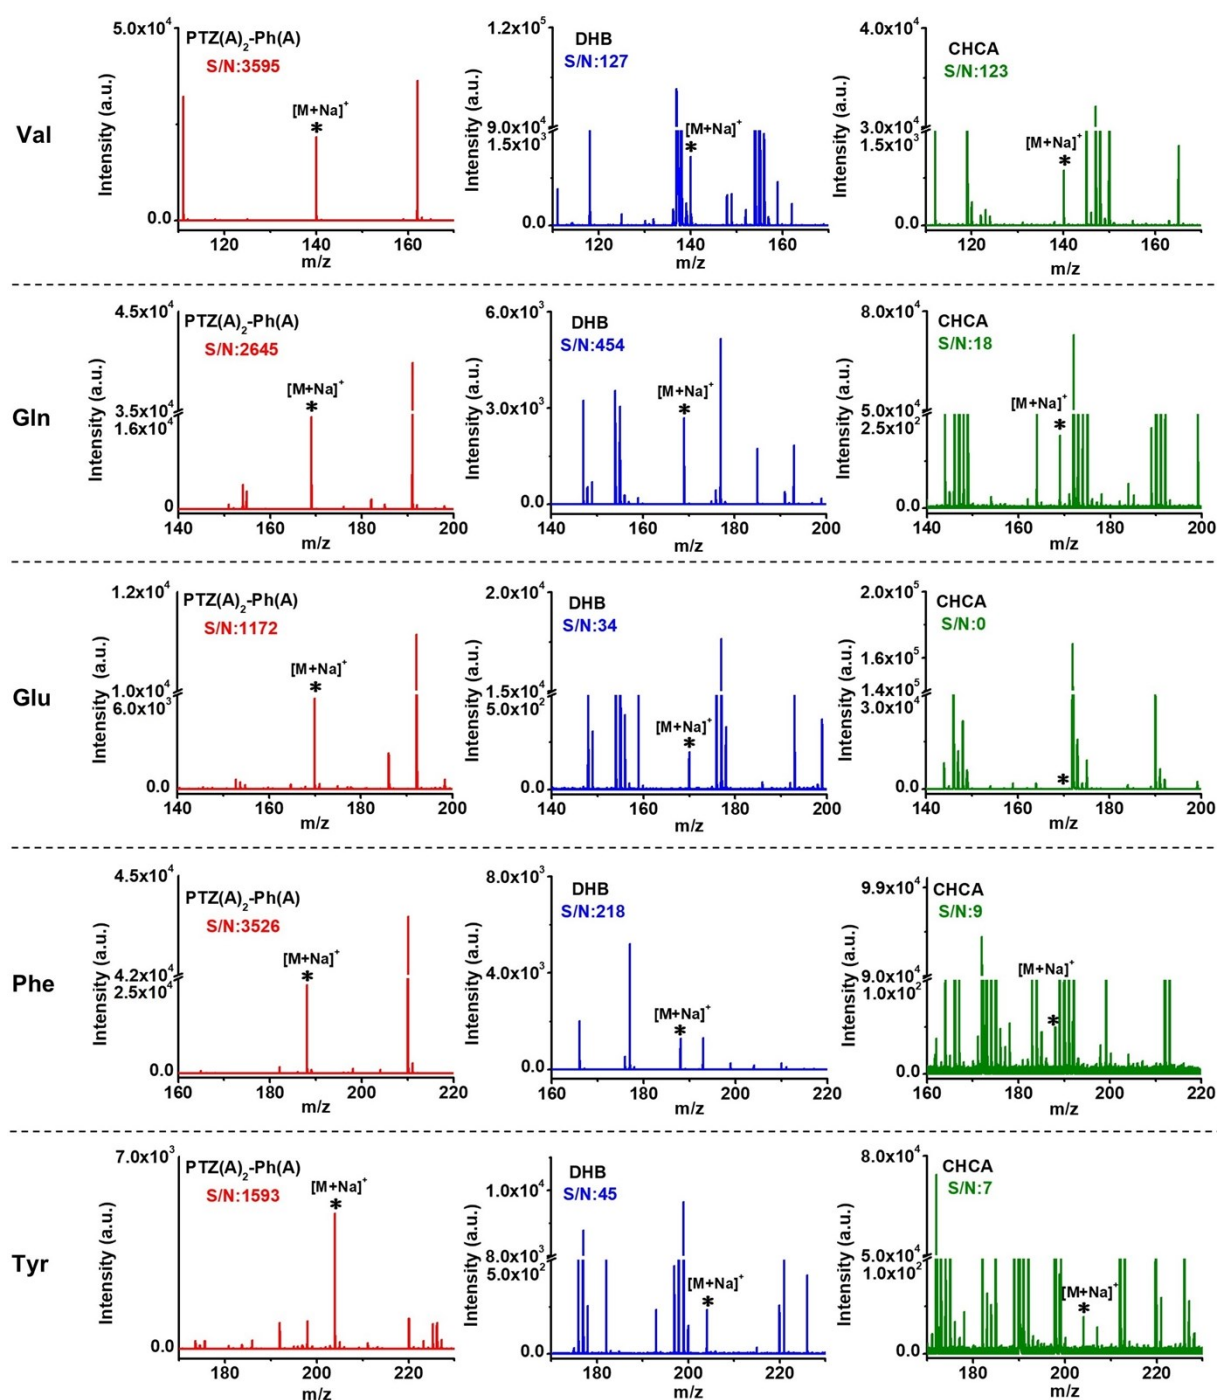

**Figure S20.** MALDI mass spectra of L-Valine (Val), L-Glutamine (Gln), L-Glutamic (Glu), L-Phenylalanine (Phe) and L-Tyrosine (Tyr) obtained from the PTZ(A)<sub>2</sub>-Ph(A) matrix and the traditional matrixes of DHB and CHCA. All analytes are tested in the concentration of 100 µg/mL.

**Table S2.** Comparison of signal to noise (S/N) ratios for selected oligosaccharides in cationization ionization mechanisms with PTZ(A)<sub>2</sub>-Ph(A), DHB and CHCA matrixes.

| Matrix              | PTZ(A) <sub>2</sub> -Ph(A) | DHB                 | CHCA                |
|---------------------|----------------------------|---------------------|---------------------|
| Ion peak<br>Analyte | [M+Na] <sup>+</sup>        | [M+Na] <sup>+</sup> | [M+Na] <sup>+</sup> |
| <b>GLC</b>          | 362                        | 48                  | 17                  |
| <b>DP2</b>          | 497                        | 62                  | 17                  |
| <b>DP3</b>          | 690                        | 298                 | 29                  |
| <b>DP4</b>          | 665                        | 328                 | 32                  |

**Table S3.** Comparison of signal to noise (S/N) ratios for selected amino acids in different ionization mechanisms with PTZ(A)<sub>2</sub>-Ph(A), DHB and CHCA matrixes.

| Matrix              | PTZ(A) <sub>2</sub> -Ph(A) | DHB                 |                    | CHCA                |                    |
|---------------------|----------------------------|---------------------|--------------------|---------------------|--------------------|
| Ion peak<br>Analyte | [M+Na] <sup>+</sup>        | [M+Na] <sup>+</sup> | [M+H] <sup>+</sup> | [M+Na] <sup>+</sup> | [M+H] <sup>+</sup> |
| <b>Val</b>          | <b>3595</b>                | <b>127</b>          | 307                | <b>123</b>          | 1502               |
| <b>Gln</b>          | <b>2645</b>                | <b>454</b>          | 510                | <b>18</b>           | 1471               |
| <b>Glu</b>          | <b>1172</b>                | <b>34</b>           | 106                | <b>0</b>            | 714                |
| <b>Phe</b>          | <b>3526</b>                | <b>218</b>          | 676                | <b>9</b>            | 1340               |
| <b>Tyr</b>          | <b>1593</b>                | <b>45</b>           | 61                 | <b>7</b>            | 1251               |



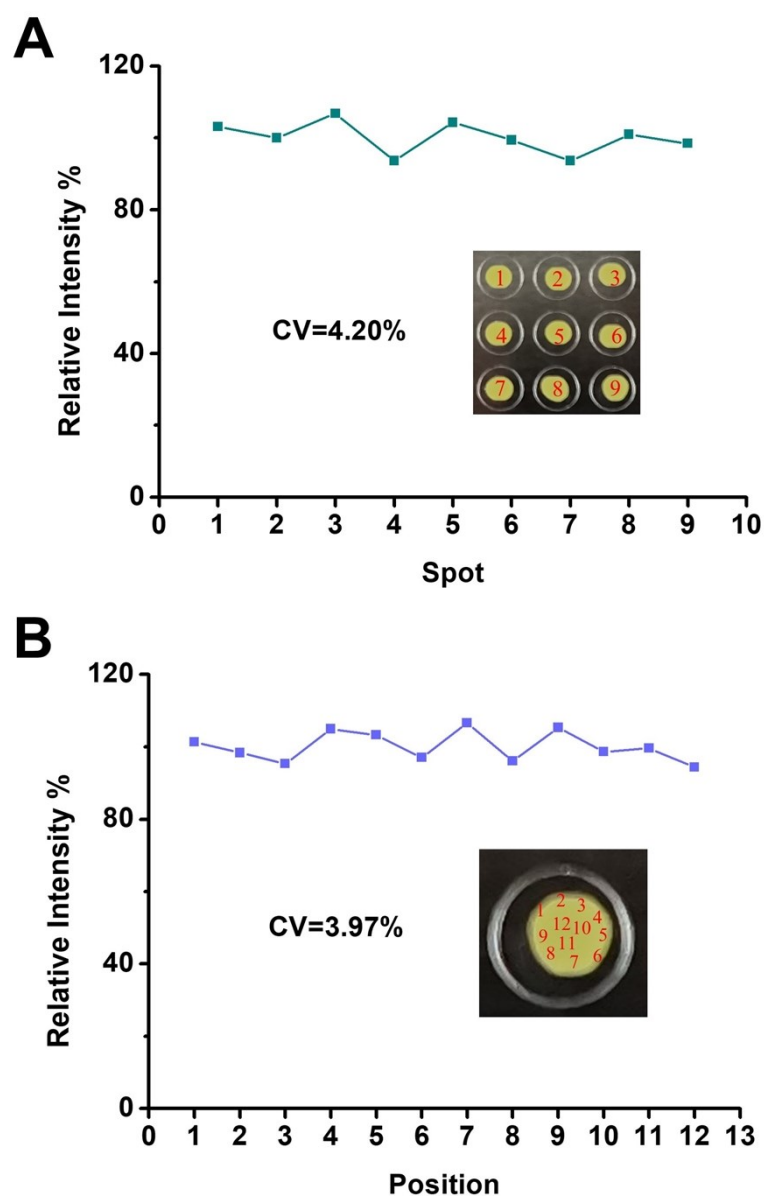

**Figure S21.** The  $\text{PTZ(A)}_2\text{-Ph(A)}$  matrix performed highly reproducible MS signal intensity. (A) 9 different spots in the  $3 \times 3$  array. (B) 12 different positions in a single spot of  $\text{GLC/ PTZ(A)}_2\text{-Ph(A)}$ . The coefficient of variation (CV) values as very small, only (A) 4.20 % in the spot-to-spot or (B) 3.97 % in the position-to-position. Inset: The Photo of the  $\text{PTZ(A)}_2\text{-Ph(A)}$  as the matrix dropped on the steel plate, forming uniform films. Analyte: D-glucose (GLC), concentration: 100  $\mu\text{g/mL}$ .

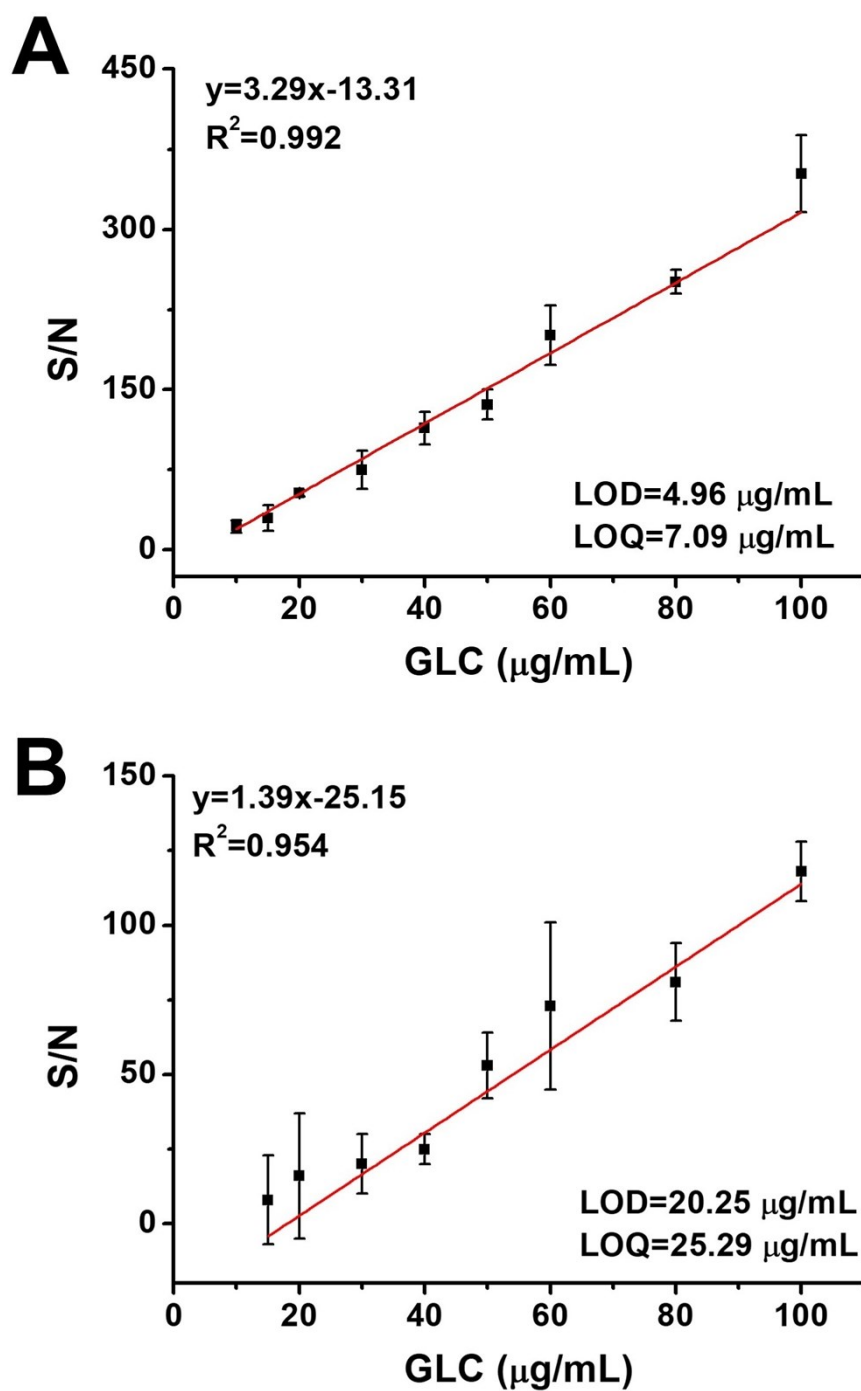

**Figure S22.** The quantitative analysis of linearity and limit-of-detection for the PTZ(A)<sub>2</sub>-Ph(A) matrix. MALDI-TOF MS response curves for different concentrations glucose (GLC) with (A) PTZ(A)<sub>2</sub>-Ph(A) matrix and (C) DHB matrix. Accumulation: 3000 shots. Laser spot size: 50~100  $\mu\text{m}$ .

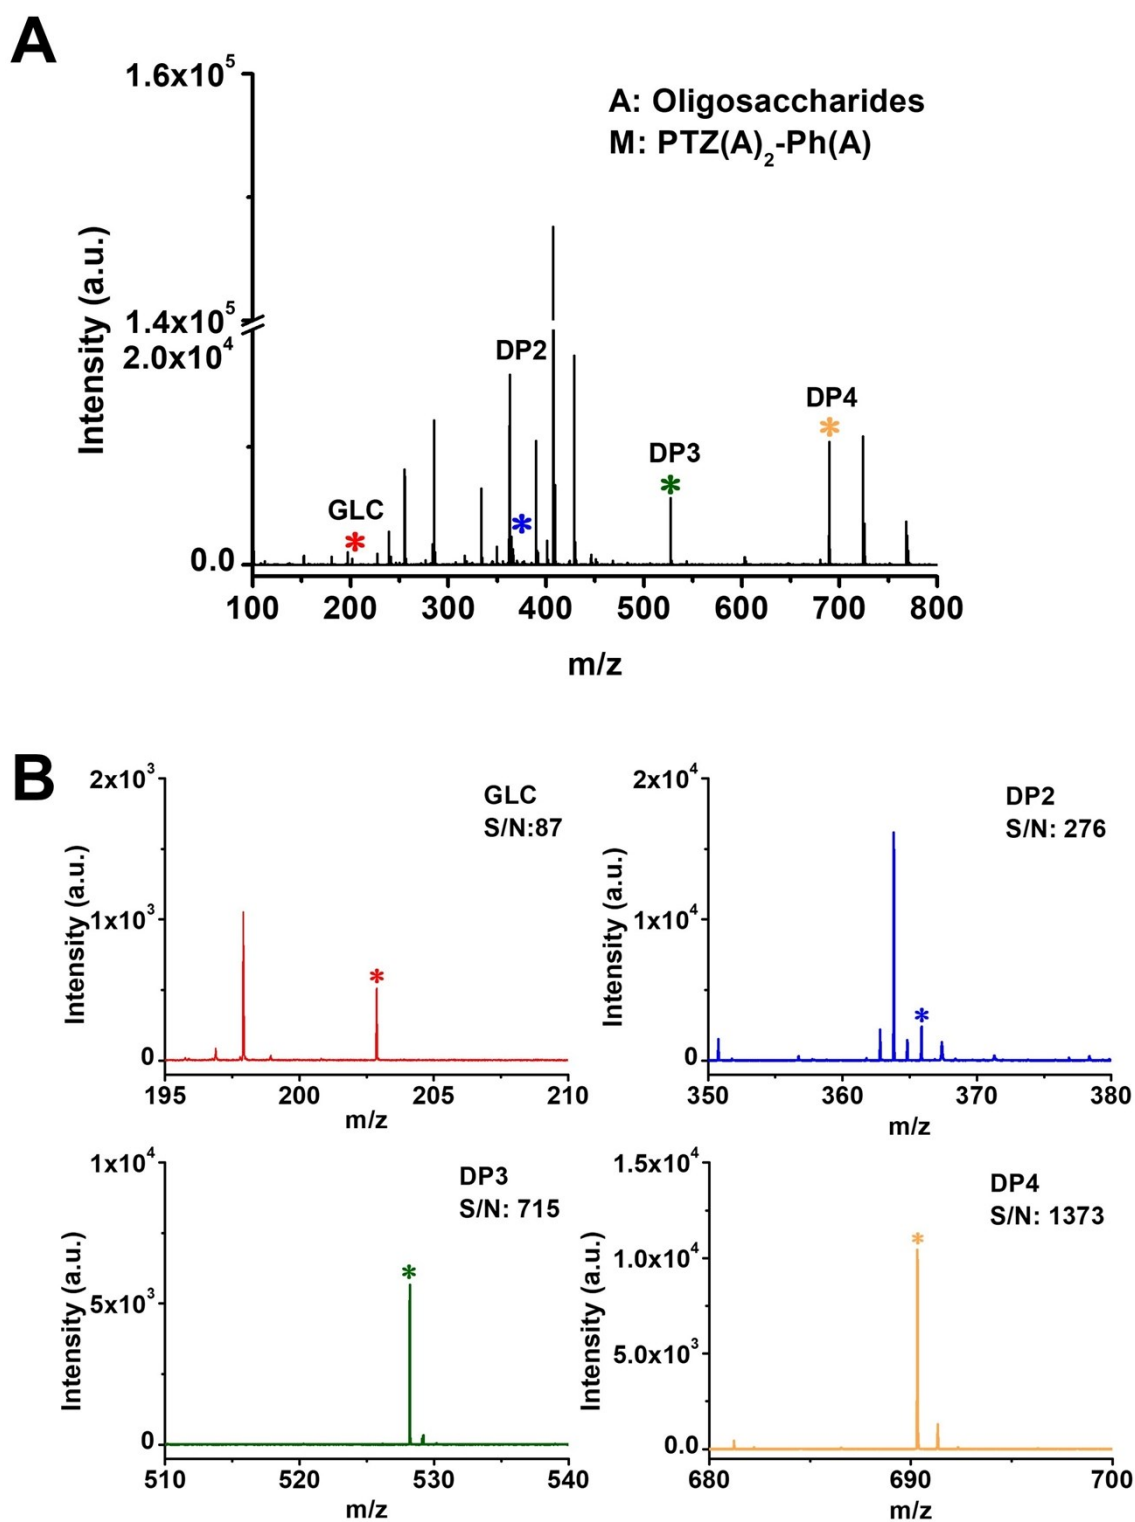

**Figure S23.** (A) MALDI-TOF mass spectra of a complex sample containing four oligosaccharides with the PTZ(A)<sub>2</sub>-Ph(A) matrix. (B) MALDI-TOF mass spectra and signal-to-noise ratio (S/N) of GLC, DP2, DP3 and DP4 in complex sample detection with the PTZ(A)<sub>2</sub>-Ph(A) matrix. The concentrations of all analytes are 250 µg/mL.

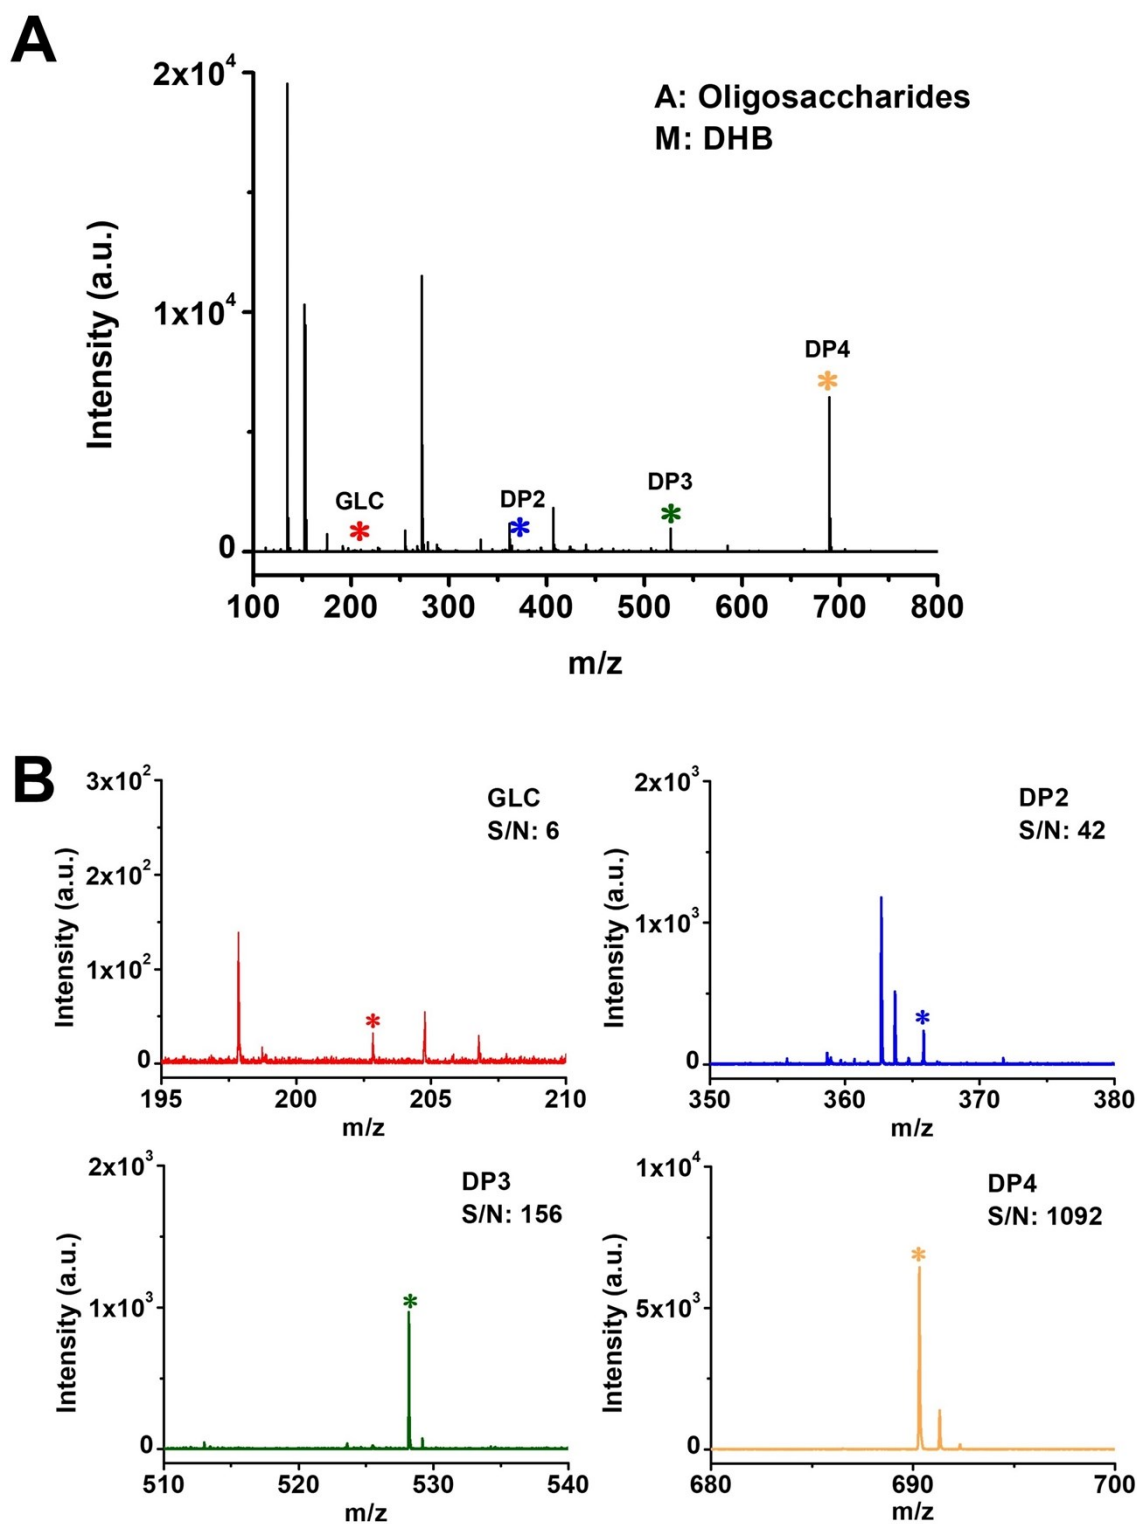

**Figure S24.** (A) MALDI-TOF mass spectra of a complex sample containing four oligosaccharides with the DHB matrix. (B) MALDI-TOF mass spectra and signal-to-noise ratio (S/N) of GLC, DP2, DP3 and DP4 in complex sample detection with the DHB matrix. The concentrations of all analytes are 250  $\mu\text{g/mL}$ .

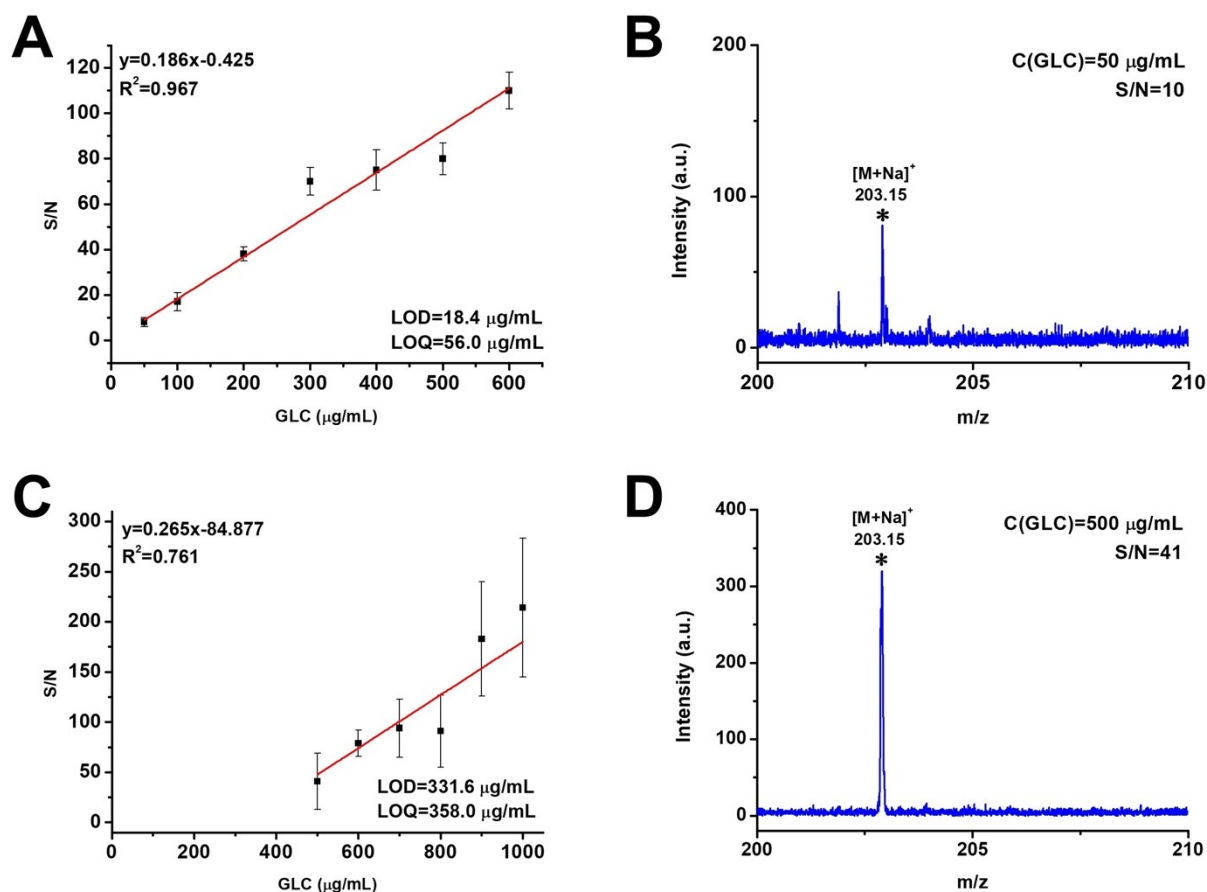

**Figure S25.** The cationization matrix of PTZ(A)<sub>2</sub>-Ph(A) applied to the detection of urine glucose (GLC). The MALDI-TOF MS response curve used for the analysis limit-of-detection (LOD) and limit-of-quantitative (LOQ) and corresponding typical MALDI mass spectrum of urine glucose (GLC) detection in positive-ion mode with (A-B) PTZ(A)<sub>2</sub>-Ph(A) matrix and (C-D) DHB matrix.

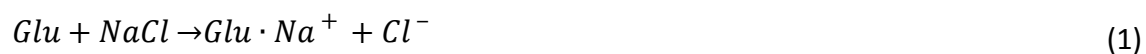

$$\Delta H = -88.70 \text{ kcal/mol}$$

$$\Delta G = -91.86 \text{ kcal/mol}$$

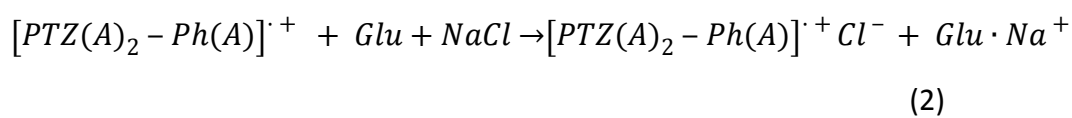

$$\Delta H = -12.90 \text{ kcal/mol}$$

$$\Delta G = -2.33 \text{ kcal/mol}$$

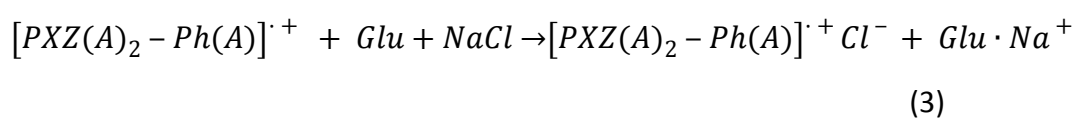

$$\Delta H = -10.36 \text{ kcal/mol}$$

$$\Delta G = 0.20 \text{ kcal/mol}$$

**Scheme S2.** The calculated enthalpy changes ( $\Delta H$ ) and Gibbs free energy changes ( $\Delta G$ ) of the reactions related to the cationization of GLC.

## Supporting Data Set 1

### 1. Synthesis of 10-phenyl-10H-phenothiazine (PTZ-Ph)

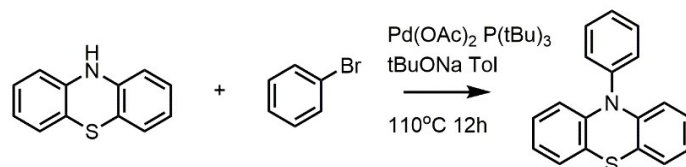

A mixture of 10H-phenothiazine (0.797 g, 4.0 mmol), 4-bromobenzonitrile (0.691 g, 4.4 mmol), sodium tert-butoxide (1.153 g, 12.0 mmol), catalyst Pd (OAc)<sub>2</sub> (90 mg, 10 mol%), and ligand P(tBu)<sub>3</sub> (1.8 mL, 10 wt % in toluene) in toluene (40 mL) was degassed by three freeze–pump–thaw cycles, and then heated at 110 °C for 12 hours under nitrogen atmosphere. After cooling to room temperature, the mixture was extracted with DCM. The organic phase was collected and dried by anhydrous MgSO<sub>4</sub>. The organic solvent was removed under reduced pressure. The crude product was purified by column chromatography on silica gel to afford a white solid in a yield of 73%. The spectral data matched those previously reported<sup>[2]</sup>.

### $^1\text{H}$ NMR spectrum of 10-phenyl-10H-phenothiazine (PTZ-Ph)

$^1\text{H}$  NMR (600 MHz,  $\text{DMSO}-d_6$ , ppm):  $\delta$  = 7.67 (t,  $J$  = 7.8 Hz, 2H), 7.54 (t,  $J$  = 7.5 Hz, 1H), 7.42 (d,  $J$  = 7.3 Hz, 2H), 7.08 (dd,  $J$  = 7.6, 1.4 Hz, 2H), 6.93 (td, 2H), 6.86 (td,  $J$  = 7.4, 1.3 Hz, 2H), 6.16 (dd,  $J$  = 8.2, 1.2 Hz, 2H).

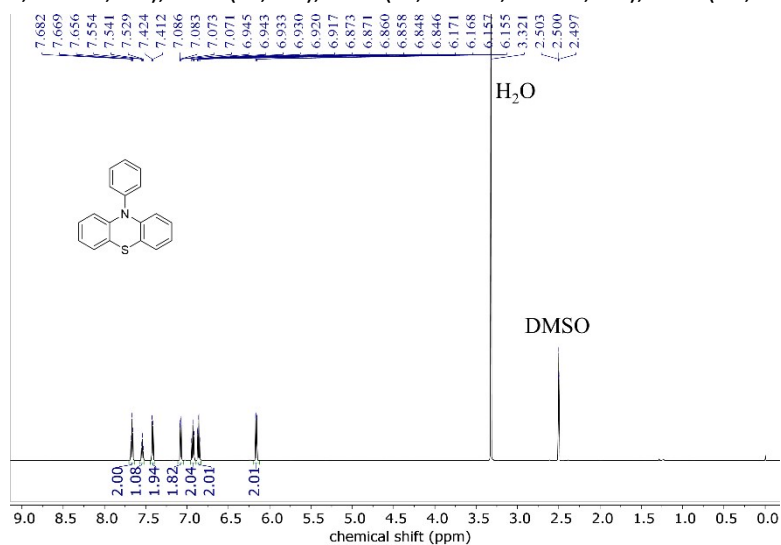

### $^{13}\text{C}$ NMR spectrum of 10-phenyl-10H-phenothiazine (PTZ-Ph)

$^{13}\text{C}$  NMR (151 MHz,  $\text{DMSO}-d_6$ , ppm):  $\delta$  = 143.55, 140.32, 131.00, 130.22, 128.36, 127.23, 126.63, 122.70, 119.36, 116.04, 39.64, 39.50, 39.36.

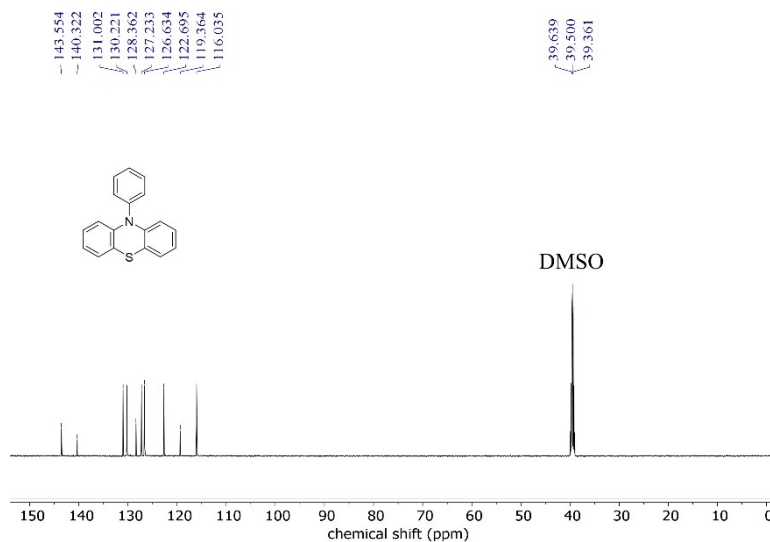



## 2. Synthesis of 10-phenyl-10H-phenoxazine (PXZ-Ph)

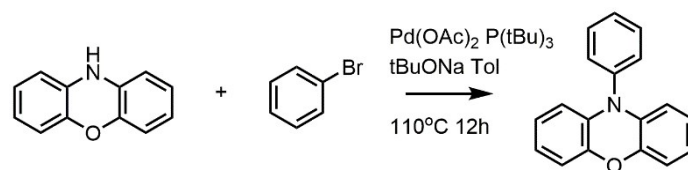

A mixture of 10H-phenoxazine (0.733 g, 4.0 mmol), 4-bromobenzonitrile (0.691 g, 4.4 mmol), sodium tert-butoxide (1.153 g, 12.0 mmol), catalyst Pd (OAc)<sub>2</sub> (90 mg, 10 mol%), and ligand P(*t*Bu)<sub>3</sub> (1.8 mL, 10 wt% in toluene) in toluene (40 mL) was degassed by three freeze–pump–thaw cycles, and then heated at 110 °C for 12 hours under nitrogen atmosphere. After cooling to room temperature, the mixture was extracted with DCM. The organic phase was collected and dried by anhydrous MgSO<sub>4</sub>. The organic solvent was removed under reduced pressure. The crude product was purified by column chromatography on silica gel to afford a white solid in a yield of 73 %.

<sup>1</sup>H NMR spectrum of 10-phenyl-10H-phenoxazine (PXZ-Ph)

<sup>1</sup>H NMR (600 MHz, DMSO-*d*<sub>6</sub>, ppm): δ = 7.64 (t, *J* = 7.8 Hz, 2H), 7.52 (t, *J* = 7.5 Hz, 1H), 7.38 (d, *J* = 7.2 Hz, 2H), 6.70 (dd, *J* = 7.5, 1.9 Hz, 2H), 6.66 – 6.60 (m, 4H), 5.80 (dd, *J* = 7.5, 1.9 Hz, 2H).

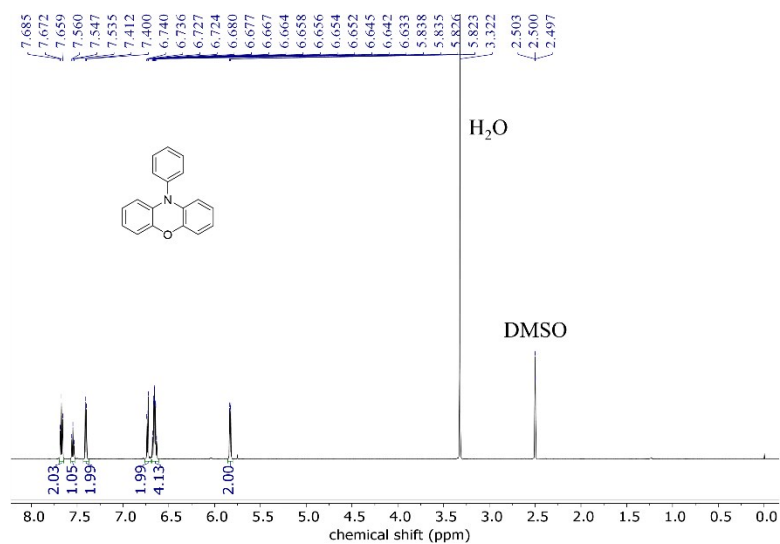

<sup>13</sup>C NMR spectrum of 10-phenyl-10H-phenoxazine (PXZ-Ph)

<sup>13</sup>C NMR (151 MHz, DMSO-*d*<sub>6</sub>, ppm): δ = 143.08, 138.26, 133.89, 131.32, 130.39, 128.77, 123.64, 121.38, 115.24, 113.07, 39.64, 39.50, 39.36.

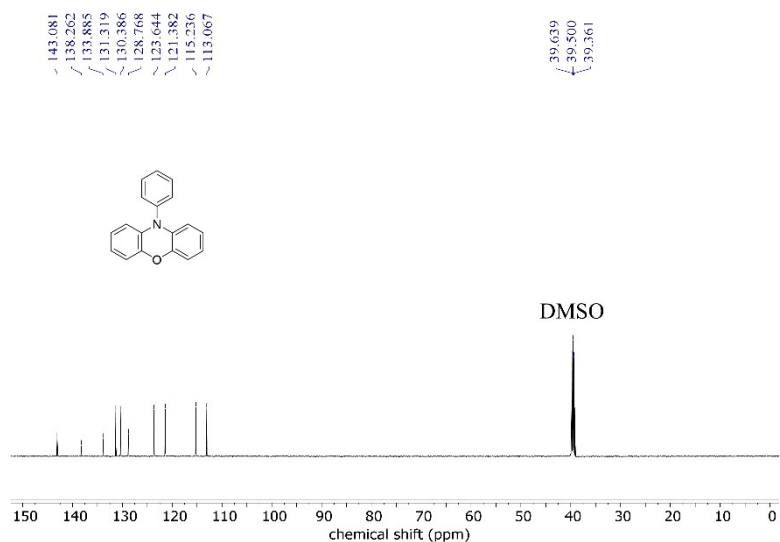

## Supporting Data Set 2

### 3. Synthesis of 4-(10H-phenothiazin-10-yl) benzoic acid (PTZ-Ph(A))

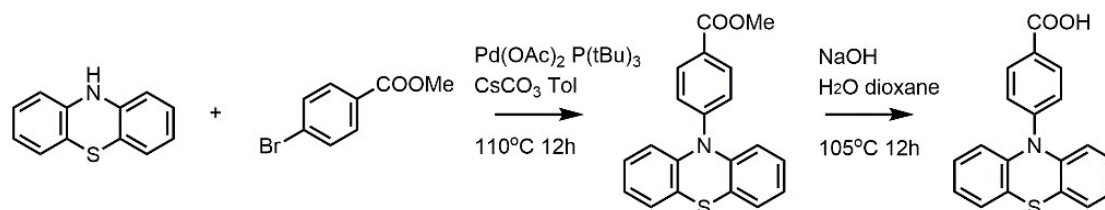

A mixture of 10H-phenothiazine (0.399 g, 2.0 mmol), methyl 4-bromobenzoate (0.473 g, 2.2 mmol),  $\text{CsCO}_3$  (4.955 g, 6.0 mmol), catalyst  $\text{Pd}(\text{OAc})_2$  (45 mg, 10 mol%), and ligand  $\text{P}(\text{tBu})_3$  (0.9 mL, 10 wt% in toluene) in toluene (40 mL) was degassed by three freeze–pump–thaw cycles, and then heated at  $110^\circ\text{C}$  for 12 hours under nitrogen atmosphere. After cooling to room temperature, the mixture was extracted with DCM. The organic phase was collected and dried by anhydrous  $\text{MgSO}_4$ . The organic solvent was removed under reduced pressure. The crude product was purified by column chromatography on silica gel to afford a primrose yellow solid in a yield of 77%.

To a solution of methyl 4-(10H-phenothiazin-10-yl) benzoate (0.333 g, 1.0 mmol) in 20 mL of dioxane, a solution of  $\text{NaOH}$  (0.320 g, 8 mmol) in  $\text{H}_2\text{O}$  (10 mL) was added, then stirred under argon atmosphere at  $105^\circ\text{C}$  for 12h. After cooling down to room temperature, the concentrated  $\text{HCl}$  aq. solution (37 %, 10 mL) was added into the mixture and the precipitate was filtered and washed with water and hexane to give the pure product in 96% yield.

<sup>1</sup>H NMR spectrum of 4-(10H-phenothiazin-10-yl) benzoic acid (PTZ-Ph(A))

<sup>1</sup>H NMR (400 MHz, DMSO-*d*<sub>6</sub>, ppm): δ = 12.88 (s, 1H), 7.99 (d, *J* = 8.8 Hz, 2H), 7.34 (dd, *J* = 7.6, 1.5 Hz, 2H), 7.20 (td, *J* = 7.4, 1.2 Hz, 2H), 7.10 (td, *J* = 7.5, 1.3 Hz, 2H), 6.85 (dd, *J* = 8.1, 1.1 Hz, 2H).

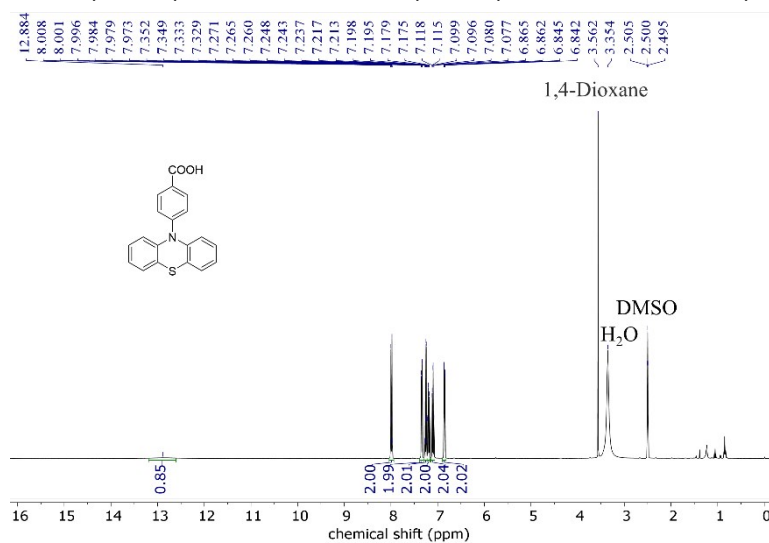

<sup>13</sup>C NMR spectrum of 4-(10H-phenothiazin-10-yl) benzoic acid (PTZ-Ph(A))

<sup>13</sup>C NMR (101 MHz, DMSO-*d*<sub>6</sub>, ppm): δ = 166.79, 146.71, 141.93, 131.57, 127.85, 127.64, 126.73, 126.47, 124.82, 122.35, 121.74, 39.71, 39.50, 39.29.

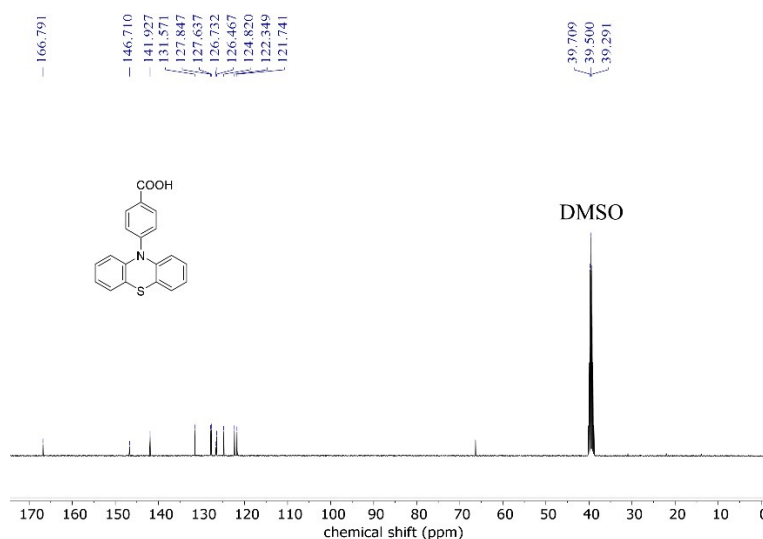

#### 4. Synthesis of 10-(4-carboxyphenyl)-10H-phenothiazine-3,7-dicarboxylic acid (PTZ(A)<sub>2</sub>-Ph(A))

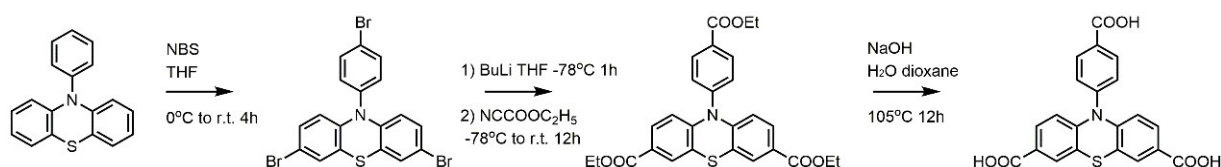

##### 4.1 Synthesis of 3,7-dibromo-10-(4-bromophenyl)-10H-phenothiazine

To a solution of PTZ-Ph (0.827 g, 3.0 mmol) in 20 mL of tetrahydrofuran (THF), a solution of N-bromosuccinimide (1.922 g, 10.8 mmol) in THF (10 mL) was added dropwise at 0 °C, then stirred under argon atmosphere at room temperature for a period of 4 h. After the reaction, the mixture was extracted with DCM three times. The combined organic layer was washed with water and then dried over anhydrous MgSO<sub>4</sub>. The solvent was removed by evaporation under reduced pressure. The crude product was purified by column chromatography on silica gel to afford a primrose white solid in a yield of 70 %.

<sup>1</sup>H NMR spectrum of 3,7-dibromo-10-(4-bromophenyl)-10H-phenothiazine

<sup>1</sup>H NMR (400 MHz, DMSO-*d*<sub>6</sub>, ppm): δ = 7.86 (d, *J* = 8.7 Hz, 2H), 7.41 (d, *J* = 8.7 Hz, 2H), 7.32 (d, *J* = 2.3 Hz, 2H), 7.12 (dd, *J* = 8.8, 2.3 Hz, 2H), 6.06 (d, *J* = 8.8 Hz, 2H).

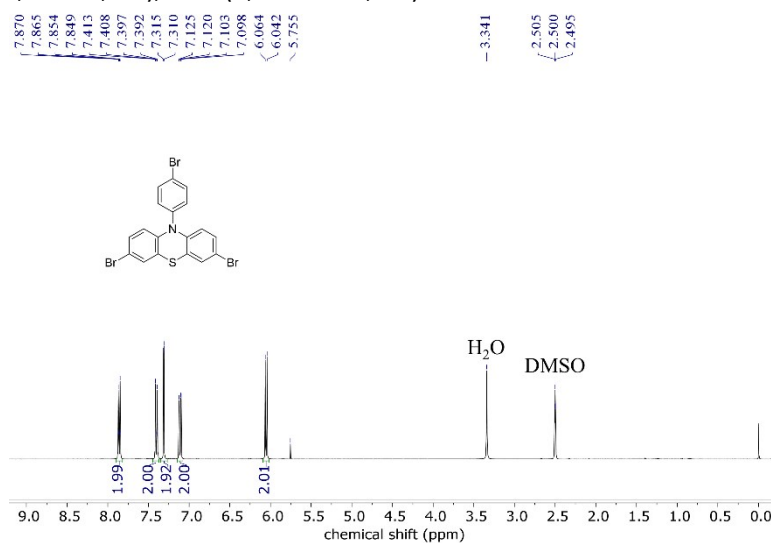

<sup>13</sup>C NMR spectrum of 3,7-dibromo-10-(4-bromophenyl)-10H-phenothiazine

<sup>13</sup>C NMR (101 MHz, DMSO-*d*<sub>6</sub>, ppm): δ = 142.23, 138.96, 134.37, 132.43, 130.12, 128.53, 121.91, 121.28, 117.73, 114.39, 39.71, 39.50, 39.29.

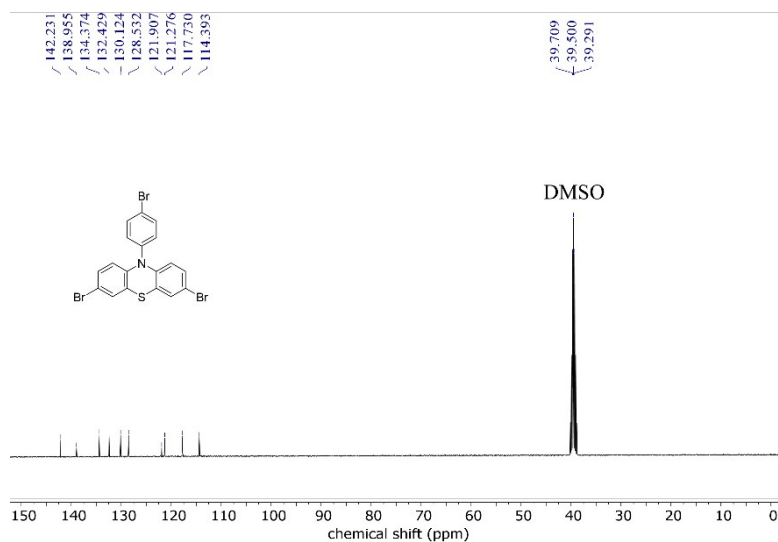

#### **4.2. Synthesis of diethyl 10-(4-(ethoxycarbonyl) phenyl)-10H-phenothiazine-3,7-dicarboxylate**

To a suspension of 1.024 g (2.0 mmol) of 3,7-dibromo-10-(4-bromophenyl)-10H-phenothiazine in 20 mL of anhydrous THF at -78 °C, a portion of 2.9 mL of n-BuLi (7.2 mmol, 2.5 M solution in n-hexane) was slowly added, and the reaction mixture was stirred for 1 hour. The  $\text{NCCOOC}_2\text{H}_5$  (9 mmol, 0.9 mL) was added to above reaction mixture at same temperature, then stirred under argon atmosphere at room temperature overnight. After the reaction, the reaction mixture was poured into water and extracted with DCM. The combined organic layer was washed with water, dried over anhydrous  $\text{MgSO}_4$ . The solvent was removed by evaporation under reduced pressure. The crude product was purified by column chromatography on silica gel to afford a primrose yellow solid in a yield of 55 %.

$^1\text{H}$  NMR spectrum of diethyl 10-(4-(ethoxycarbonyl) phenyl)-10H-phenothiazine-3,7-dicarboxylate

$^1\text{H}$  NMR (600 MHz,  $\text{DMSO}-d_6$ , ppm):  $\delta$  = 8.24 (d,  $J$  = 8.4 Hz, 2H), 7.63 (d,  $J$  = 8.4 Hz, 2H), 7.55 (d,  $J$  = 1.6 Hz, 2H), 7.46 (dd,  $J$  = 8.7, 1.8 Hz, 2H), 6.13 (d,  $J$  = 8.7 Hz, 2H), 4.36 (d,  $J$  = 7.1 Hz, 2H), 4.22 (q,  $J$  = 7.1 Hz, 3H), 1.34 (t,  $J$  = 7.1 Hz, 4H), 1.24 (t,  $J$  = 7.1 Hz, 6H).

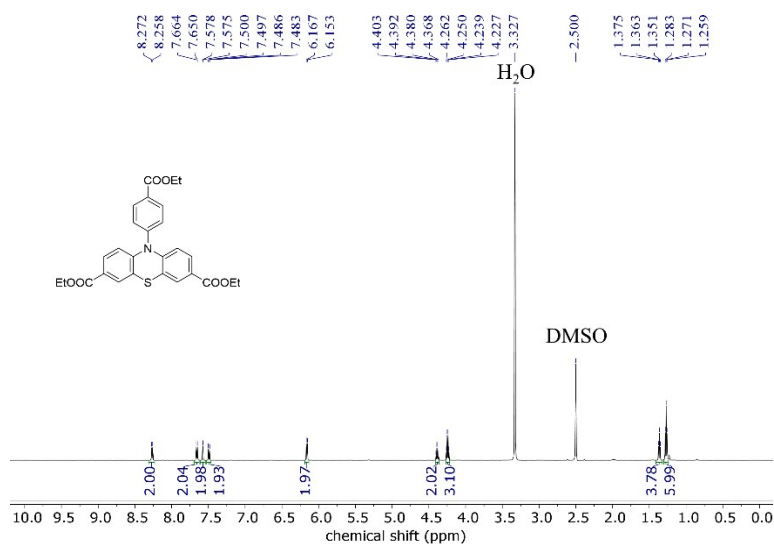

$^{13}\text{C}$  NMR spectrum of diethyl 10-(4-(ethoxycarbonyl) phenyl)-10H-phenothiazine-3,7-dicarboxylate

$^{13}\text{C}$  NMR (151 MHz,  $\text{DMSO}-d_6$ , ppm):  $\delta$  = 164.91, 164.41, 145.72, 143.26, 132.32, 130.68, 130.54, 129.10, 127.19, 124.86, 118.74, 115.94, 61.13, 60.62, 39.64, 39.50, 39.36, 14.10.

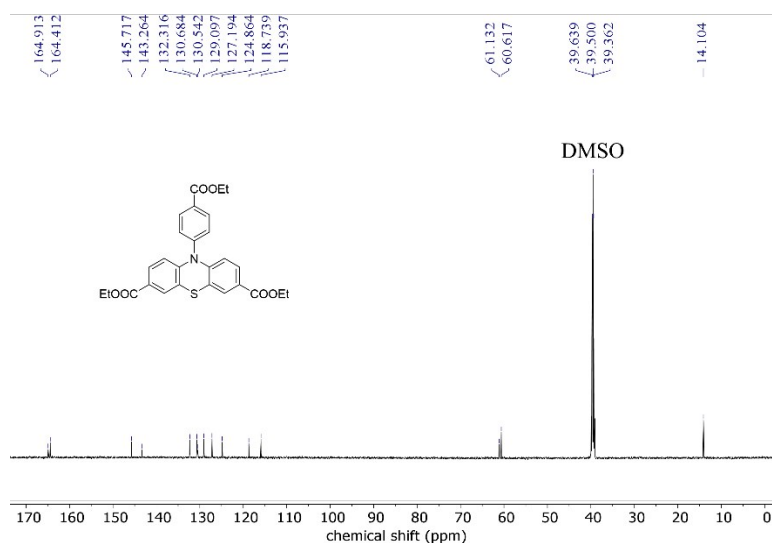



### 4.3 Synthesis of 10-(4-carboxyphenyl)-10H-phenothiazine-3,7-dicarboxylic acid (PTZ(A)<sub>2</sub>-Ph(A))

To a solution of diethyl 10-(4-(ethoxycarbonyl) phenyl)-10H-phenothiazine-3,7-dicarboxylate (0.246 g, 0.5 mmol) in 20 mL of dioxane, a solution of NaOH (0.160 g, 4 mmol) in H<sub>2</sub>O (10 mL) was added, then stirred under argon atmosphere at 105 °C for 12 h. After cooling down to room temperature, the concentrated HCl aq. solution (37 %, 10 mL) was added into the mixture and the precipitate was filtered and washed with water and hexane to give the pure product in 95 % yield.

$^1\text{H}$  NMR spectrum of 10-(4-carboxyphenyl)-10H-phenothiazine-3,7-dicarboxylic acid (PTZ(A)<sub>2</sub>-Ph(A))

$^1\text{H}$  NMR (600 MHz, DMSO-*d*<sub>6</sub>, ppm):  $\delta$  = 12.90 (s, 3H), 8.21 (d, *J* = 8.5 Hz, 2H), 7.59 (d, *J* = 8.5 Hz, 2H), 7.53 (d, *J* = 2.0 Hz, 2H), 7.45 (dd, *J* = 8.7, 2.0 Hz, 2H), 6.12 (d, *J* = 8.7 Hz, 2H).

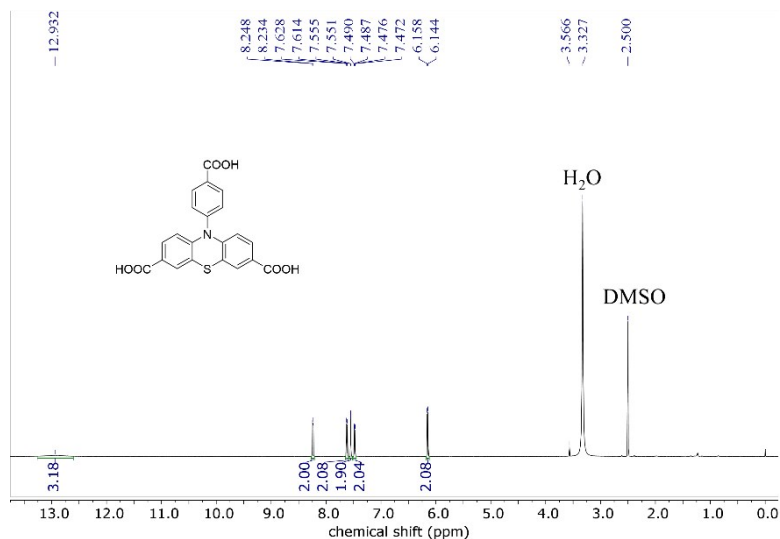

$^{13}\text{C}$  NMR spectrum of 10-(4-carboxyphenyl)-10H-phenothiazine-3,7-dicarboxylic acid (PTZ(A)<sub>2</sub>-Ph(A))

$^{13}\text{C}$  NMR (151 MHz, DMSO-*d*<sub>6</sub>, ppm);  $\delta$  = 166.53, 166.03, 145.64, 143.12, 132.44, 131.49, 130.54, 129.26, 127.46, 125.73, 118.62, 115.86, 39.64, 39.50, 39.36.

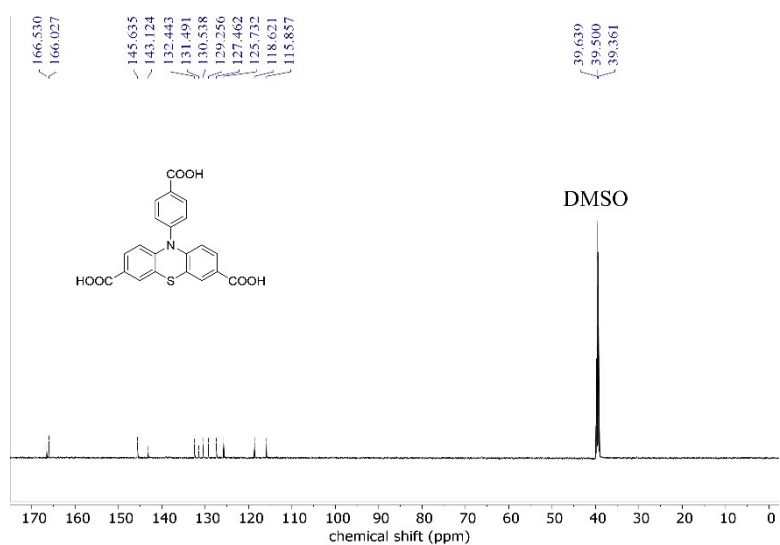

## 5. Synthesis of 4-(10H-phenoxazine-10-yl) benzoic acid (PXZ-Ph(A))

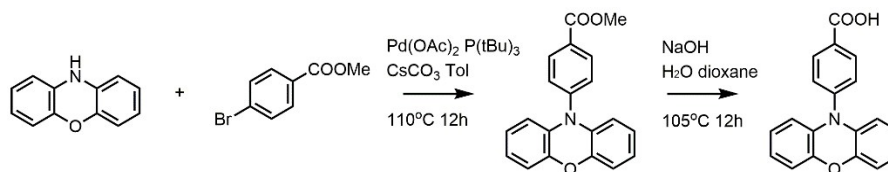

A mixture of 10H-phenoxazine (0.366 g, 2.0 mmol), methyl 4-bromobenzoate (0.473 g, 2.2 mmol), CsCO<sub>3</sub> (4.955 g, 6.0 mmol), catalyst Pd(OAc)<sub>2</sub> (45 mg, 10 mol%), and ligand P(tBu)<sub>3</sub> (0.9 mL, 10 wt% in toluene) in toluene (40 mL) was degassed by three freeze–pump–thaw cycles, and then heated at 110 °C for 12 hours under nitrogen atmosphere. After cooling to room temperature, the mixture was extracted with DCM. The organic phase was collected and dried by anhydrous MgSO<sub>4</sub>. The organic solvent was removed under reduced pressure. The crude product was purified by column chromatography on silica gel to afford a primrose yellow solid in a yield of 77 %.

To a solution of methyl 4-(10H-phenoxazine -10-yl) benzoate (0.317 g, 1.0mmol) in 20 mL of dioxane, a solution of NaOH (0.320 g, 8 mmol) in H<sub>2</sub>O (10 mL) was added, then stirred under argon atmosphere at 105 °C for 12 h. After cooling down to room temperature, the concentrated HCl aq. solution (37 %, 10 mL) was added into the mixture and the precipitate was filtered and washed with water and hexane to give the pure product in 96 % yield.

<sup>1</sup>H NMR spectrum of 4-(10H-phenoxazine-10-yl) benzoic acid (PXZ-Ph(A))

<sup>1</sup>H NMR (600 MHz, DMSO-*d*<sub>6</sub>, ppm) δ = 13.18 (s, 1H), 8.17 (d, *J* = 8.4 Hz, 2H), 7.53 (d, *J* = 8.4 Hz, 2H), 6.74 (dd, *J* = 7.7, 1.6 Hz, 2H), 6.66 (dtd, *J* = 21.7, 7.5, 1.6 Hz, 4H), 5.87 (dd, *J* = 7.8, 1.6 Hz, 2H).

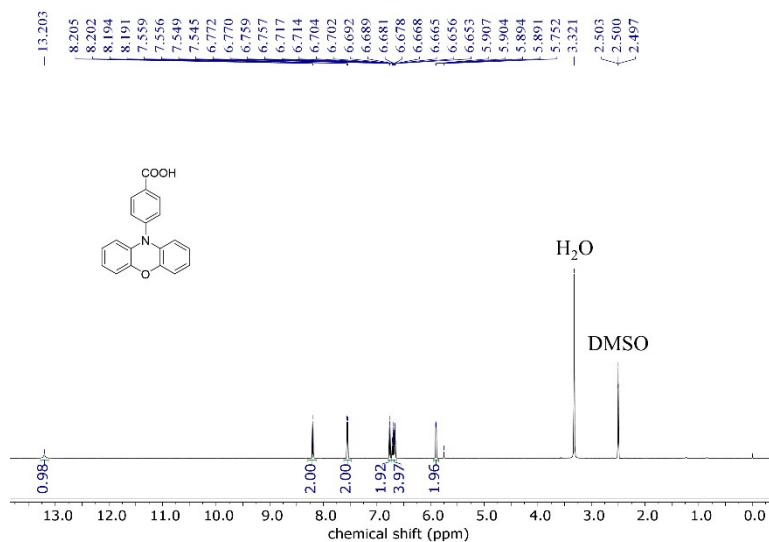

<sup>13</sup>C NMR spectrum of 4-(10H-phenoxazine-10-yl) benzoic acid (PXZ-Ph(A))

<sup>13</sup>C NMR (151 MHz, DMSO-*d*<sub>6</sub>, ppm): δ = 166.59, 143.15, 142.55, 133.34, 132.29, 130.90, 130.70, 123.74, 121.80, 115.43, 113.33, 39.64, 39.50, 39.36.

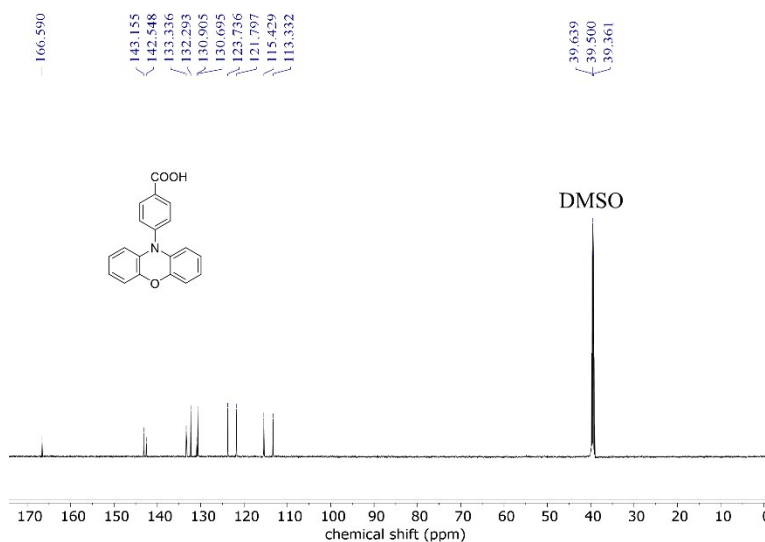

## 6. Synthesis of 10-(4-carboxyphenyl)-10H-phenoxazine -3,7-dicarboxylic acid (PXZ(A)<sub>2</sub>-Ph(A))

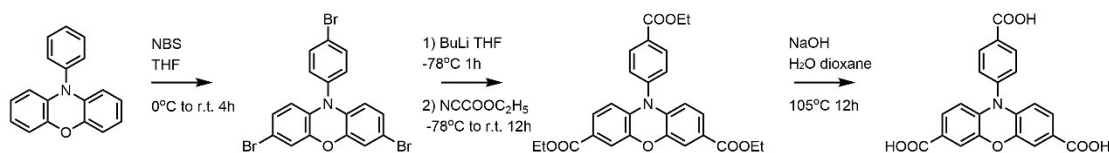

### 6.1 Synthesis of 3,7-dibromo-10-(4-bromophenyl)-10H-phenoxazine

To a solution of PXZ-Ph (0.778 g, 3.0 mmol) in 20 mL of tetrahydrofuran (THF), a solution of N-bromosuccinimide (1.922 g, 10.8 mmol) in THF (10 mL) was added dropwise at 0 °C, then stirred under argon atmosphere at room temperature for a period of 4 h. After the reaction, the mixture was extracted with DCM three times. The combined organic layer was washed with water and then dried over anhydrous MgSO<sub>4</sub>. The solvent was removed by evaporation under reduced pressure. The crude product was purified by column chromatography on silica gel to afford a primrose white solid in a yield of 70 %.

<sup>1</sup>H NMR spectrum of 3,7-dibromo-10-(4-bromophenyl)-10H-phenoxazine

<sup>1</sup>H NMR (400 MHz, DMSO-*d*<sub>6</sub>, ppm): δ = 7.87 (td, 2H), 7.42 (td, 2H), 6.95 (d, *J* = 2.2 Hz, 2H), 6.86 (dd, *J* = 8.6, 2.2 Hz, 2H), 5.80 (d, *J* = 8.6 Hz, 2H).

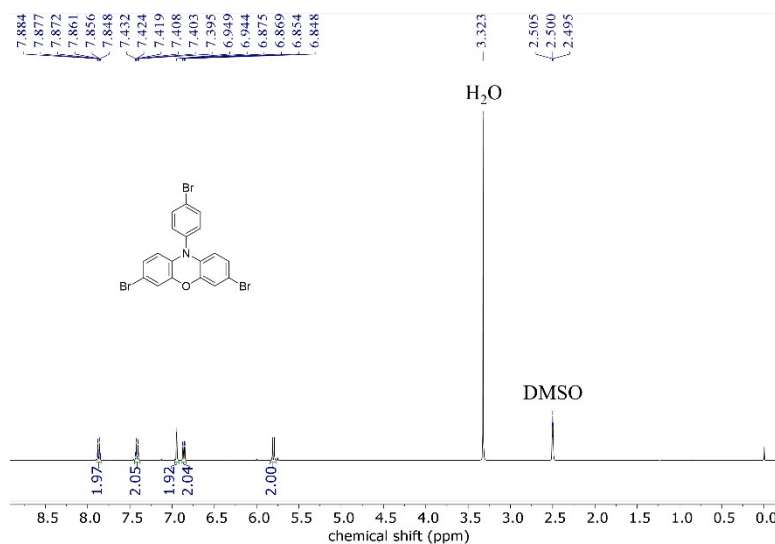

<sup>13</sup>C NMR spectrum of 3,7-dibromo-10-(4-bromophenyl)-10H-phenoxazine

<sup>13</sup>C NMR (151 MHz, DMSO-*d*<sub>6</sub>, ppm): δ = 143.50, 136.82, 134.62, 132.71, 132.60, 126.67, 122.30, 118.00, 114.76, 112.20, 39.64, 39.50, 39.36.

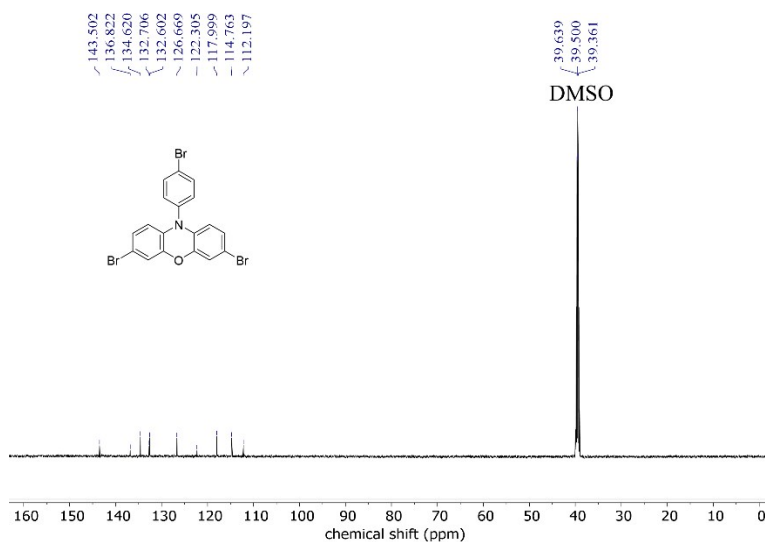

## 6.2. Synthesis of diethyl 10-(4-(ethoxycarbonyl) phenyl)-10H-phenoxazine-3,7-dicarboxylate

To a suspension of 0.992 g (2.0 mmol) of 3,7-dibromo-10-(4-bromophenyl)-10H-phenoxazine in 20 mL of anhydrous THF at -78 °C, a portion of 2.9 mL of n-BuLi (7.2 mmol, 2.5 M solution in n-hexane) was slowly added, and the reaction mixture was stirred for 1 hour. The  $\text{NCCOOC}_2\text{H}_5$  (9 mmol, 0.9 mL) was added to above reaction mixture at same temperature, then stirred under argon atmosphere at room temperature overnight. After the reaction, the reaction mixture was poured into water and extracted with DCM. The combined organic layer was washed with water, dried over anhydrous  $\text{MgSO}_4$ . The solvent was removed by evaporation under reduced pressure. The crude product was purified by column chromatography on silica gel to afford a primrose yellow solid in a yield of 55 %.

<sup>1</sup>H NMR spectrum of diethyl 10-(4-(ethoxycarbonyl) phenyl)-10H-phenoxazine-3,7-dicarboxylate

<sup>1</sup>H NMR (400 MHz, DMSO-*d*<sub>6</sub>, ppm): δ = 8.26 (d, *J* = 8.4 Hz, 2H), 7.66 (d, *J* = 8.4 Hz, 2H), 7.30 (dd, *J* = 8.4, 1.8 Hz, 2H), 7.21 (d, *J* = 1.8 Hz, 2H), 5.96 (d, *J* = 8.4 Hz, 2H), 4.38 (q, *J* = 7.1 Hz, 2H), 4.24 (q, *J* = 7.1 Hz, 4H), 1.36 (t, *J* = 7.1 Hz, 3H), 1.27 (t, *J* = 7.1 Hz, 6H).

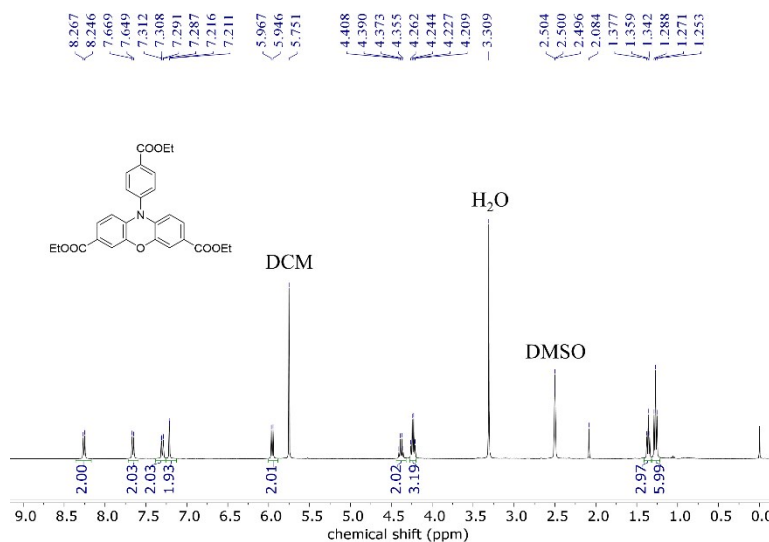

<sup>13</sup>C NMR spectrum of diethyl 10-(4-(ethoxycarbonyl) phenyl)-10H-phenoxazine-3,7-dicarboxylate

<sup>13</sup>C NMR (101 MHz, DMSO-*d*<sub>6</sub>, ppm): δ = 164.87, 164.47, 142.65, 140.93, 136.55, 132.37, 130.80, 130.53, 125.93, 123.74, 115.50, 113.25, 61.09, 60.46, 39.71, 39.50, 39.29, 14.07.

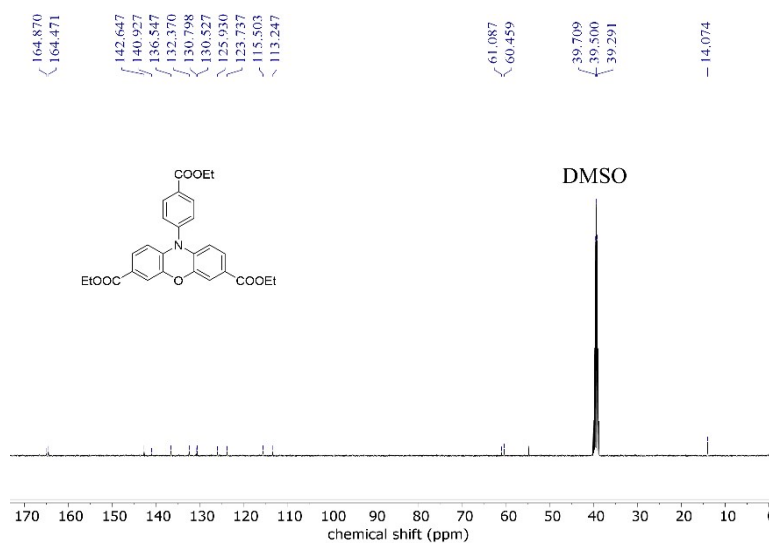



### 6.3 Synthesis of 10-(4-carboxyphenyl)-10H-phenoxazine -3,7-dicarboxylic acid (PXZ(A)<sub>2</sub>-Ph(A))

To a solution of diethyl 10-(4-(ethoxycarbonyl) phenyl)-10*H*-phenoxazine-3,7-dicarboxylate (0.238 g, 0.5 mmol) in 20 mL of dioxane, a solution of NaOH (0.160 g, 4 mmol) in H<sub>2</sub>O (10 mL) was added, then stirred under argon atmosphere at 105 °C for 12 h. After cooling down to room temperature, the concentrated HCl aq. solution (37 %, 10 mL) was added into the mixture and the precipitate was filtered and washed with water and hexane to give the pure product in 95 % yield.

$^1\text{H}$  NMR spectrum of 10-(4-carboxyphenyl)-10H-phenoxazine -3,7-dicarboxylic acid (PXZ(A)<sub>2</sub>-Ph(A))

$^1\text{H}$  NMR (400 MHz, DMSO-*d*<sub>6</sub>, ppm):  $\delta$  = 12.91 (s, 3H), 8.24 (d, *J* = 8.3 Hz, 2H), 7.63 (d, *J* = 8.2 Hz, 2H), 7.29 (d, *J* = 8.5 Hz, 2H), 7.20 (s, 2H), 5.94 (d, *J* = 8.4 Hz, 2H).

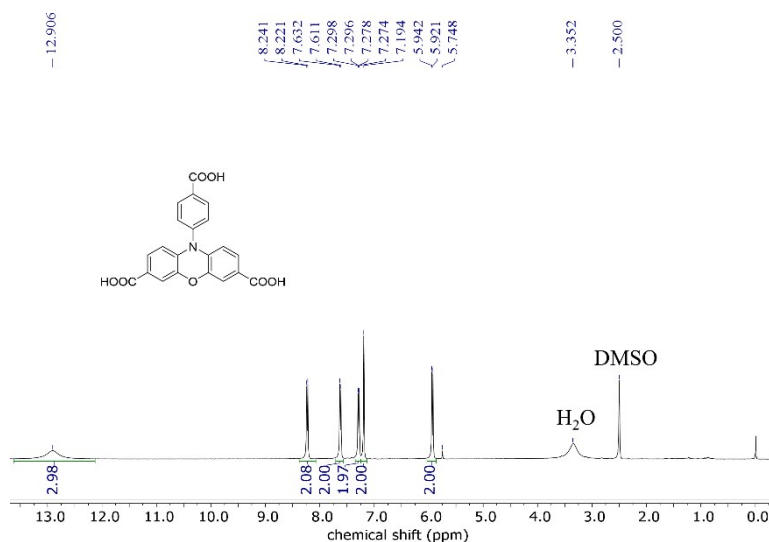

$^{13}\text{C}$  NMR spectrum of 10-(4-carboxyphenyl)-10H-phenoxazine -3,7-dicarboxylic acid (PXZ(A)<sub>2</sub>-Ph(A))

$^{13}\text{C}$  NMR (101 MHz, DMSO-*d*<sub>6</sub>, ppm):  $\delta$  = 166.47, 166.10, 142.60, 140.80, 136.39, 132.50, 131.75, 130.38, 126.06, 124.62, 115.75, 113.11, 39.71, 39.50, 39.29.

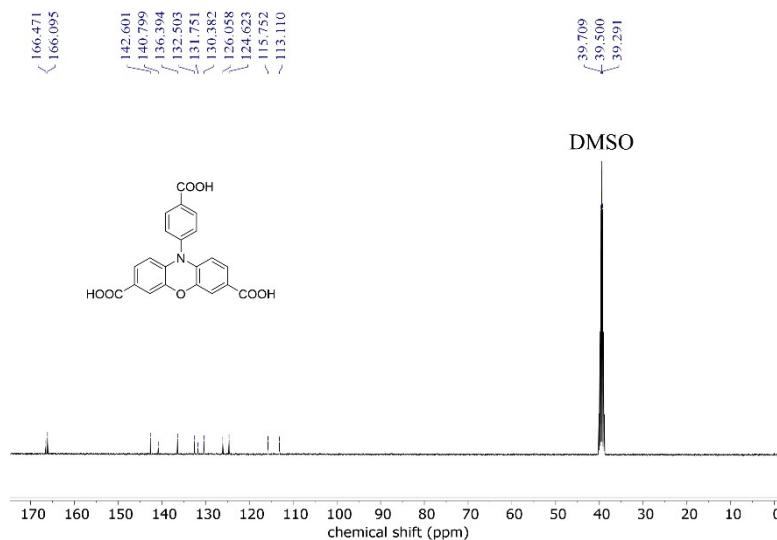

## Reference

- [1] M. J. Frisch, G. Trucks, H. B. Schlegel, G. E. Scuseria, M. A. Robb, J. Cheeseman, G. Scalmani, V. Barone, B. Mennucci, G. A. Petersson, H. Nakatsuji, M. Caricato, X. Li, H. P. Hratchian, A. F. Izmaylov, J. Bloino, G. Zheng, J. Sonnenberg, M. Hada and D. Fox, 2009.
- [2] N. J. Treat, H. Sprafke, J. W. Kramer, P. G. Clark, B. E. Barton, J. Read de Alaniz, B. P. Fors and C. J. Hawker, *Journal of the American Chemical Society*, 2014, **136**, 16096-16101.

## Abbreviations:

PTZ-Ph: 10-phenyl-10H-phenothiazine

PXZ-Ph: 10-phenyl-10H-phenoxazine

PTZ-Ph(A): 4-(10H-phenothiazin-10-yl) benzoic acid

PXZ-Ph(A): 4-(10H-phenoxazine-10-yl) benzoic acid

PTZ(A)<sub>2</sub>-Ph(A): 10-(4-carboxyphenyl)-10H-phenothiazine-3,7-dicarboxylic acid

PXZ(A)<sub>2</sub>-Ph(A): 10-(4-carboxyphenyl)-10H-phenoxazine-3,7-dicarboxylic acid
